1 **Cell-to-cell variation in defective virus expression and effects on host responses during**  
2 **influenza virus infection**

3

4 Chang Wang<sup>1</sup>, Christian V. Forst<sup>2</sup>, Tsui-wen Chou<sup>1</sup>, Adam Geber<sup>1</sup>, Minghui Wang<sup>2</sup>, Wissam  
5 Hamou<sup>2</sup>, Melissa Smith<sup>2</sup>, Robert Sebra<sup>2</sup>, Bin Zhang<sup>2</sup>, Bin Zhou<sup>1,#</sup>, and Elodie Ghedin<sup>1,3\*</sup>

6

7 <sup>1</sup>Center for Genomics and Systems Biology, Department of Biology, New York University

8 <sup>2</sup>Mount Sinai Center for Transformative Disease Modeling, Department of Genetics and  
9 Genomic Sciences, Icahn Institute of Genomics and Multiscale Biology, Icahn School of  
10 Medicine at Mount Sinai

11 <sup>3</sup>College of Global Public Health, New York University, New York, New York

12 #Current address: Bin Zhou, [nmb7@cdc.gov](mailto:nmb7@cdc.gov), Influenza Division, National Center for  
13 Immunization and Respiratory Diseases, Centers for Disease Control and Prevention, Atlanta,  
14 Georgia

15

16 \* Corresponding author

17 E-mail: [elodie.ghedin@nyu.edu](mailto:elodie.ghedin@nyu.edu)

18

19 **ABSTRACT**

20 Virus and host factors contribute to cell-to-cell variation in viral infections and determine the  
21 outcome of the overall infection. However, the extent of the variability at the single cell level and  
22 how it impacts virus-host interactions at a systems level are not well understood. To  
23 characterize the dynamics of viral transcription and host responses, we used single-cell RNA  
24 sequencing to quantify at multiple time points the host and viral transcriptomes of human A549  
25 cells and primary bronchial epithelial cells infected with influenza A virus. We observed  
26 substantial variability of viral transcription between cells, including the accumulation of defective  
27 viral genomes (DVGs) that impact viral replication. We show a correlation between DVGs and  
28 viral-induced variation of the host transcriptional program and an association between  
29 differential induction of innate immune response genes and attenuated viral transcription in  
30 subpopulations of cells. These observations at the single cell level improve our understanding of  
31 the complex virus-host interplay during influenza infection.

32

33 **AUTHOR SUMMARY**

34 Defective influenza virus particles, which are products of error-prone viral replication, carry  
35 incomplete versions of the genome and can interfere with the replication of competent viruses.  
36 These defective genomes are thought to modulate disease severity and pathogenicity of the  
37 influenza infection. Different defective viral genomes can have different interfering abilities, and  
38 introduce another source of variation across a heterogeneous cell population. Evaluating the  
39 impact of defective virus genomes on host cell responses cannot be fully resolved at the  
40 population level, requiring single cell transcriptional profiling. Here we characterized virus and  
41 host transcriptomes in influenza-infected cells, including that of defective viruses that arise  
42 during influenza A virus infection. We profiled single cell transcriptional landscapes over the  
43 course of the infection and established an association between defective virus transcription and  
44 host responses. We identified dominant defective viral genome species and validated their  
45 interfering and immunostimulatory functions *in vitro*. This study demonstrates the intricate  
46 effects of defective viral genomes on host transcriptional responses and highlights the  
47 importance of capturing host-virus interactions at the single-cell level.

48

## 49 INTRODUCTION

50 The productivity of viral replication at the cell population level is determined by cell-to-cell  
51 variation in viral infection [1]. The genetically diverse nature of RNA viruses and the  
52 heterogeneity of host cell states contribute to this inter-cell variability, which can impact  
53 therapeutic applications [2, 3]. Although previous studies of cell-to-cell variation during viral  
54 infection have mainly centered on non-segmented viruses such as poliovirus [2, 4], vesicular  
55 stomatitis virus (VSV) [5, 6], or dengue (DENV) and zika (ZIKV) viruses [7], heterogeneity  
56 across cells may be further complicated for viruses with a segmented genome, such as  
57 influenza A virus (IAV). IAV-infected cells display substantial cell-to-cell variation as it pertains to  
58 relative abundance of different viral genome segments [1, 8], transcripts [9], and their encoded  
59 proteins [10], which can result in non-productive infection in a large fraction of cells.

60

61 Defective interfering (DI) particles readily generated during successive high multiplicity of  
62 infection (MOI) in cell culture passages [11-14] and observed in natural infections [15, 16] are  
63 likely by-products of an inefficient IAV replication process and have a significant effect on  
64 productive infection. DI viruses have incomplete viral genomes with large internal deletions and  
65 they possess the ability to interfere with the replication of infectious viruses. Because DIs  
66 diminish the productivity of infectious progenies and could impact disease outcome, they are of  
67 great interest for therapeutic and prophylactic purposes (reviewed in [17]). A specific influenza  
68 DI (i.e., DI244) was shown to effectively provide prophylactic and therapeutic protection against  
69 IAV infection in mice [18]. One of the ways influenza DIs are thought to modulate viral infections  
70 is through interaction with a cytosolic pathogen-recognition receptor (PRR), RIG-I, essential for  
71 interferon (IFN) induction [19]. Besides enhanced IFN induction during infection with DI-rich  
72 influenza virus populations observed *in vitro* and *in vivo*, it has been assumed that DI virus could  
73 also compete with standard virus for cellular resources (reviewed in [17, 20]).

74

75 While diverse DI viruses can arise during IAV infection [21], the emergence and accumulation of  
76 distinct DIs, as well as other defective virus genomes (DVGs), has not been characterized at a  
77 single cell resolution, although the diversity of DIs present could be contributing to the observed  
78 cell-to-cell variation in host transcription.

79

80 We probed viral and host transcriptomes simultaneously in the same cells using single-cell  
81 RNA-seq to monitor host-virus interactions in cultured cells over the course of the infection. This  
82 data established a temporal association between the level of viral transcription and the  
83 alteration of the host transcriptome, and characterized the diversity and accumulation of DVG  
84 transcripts.

85

## 86 RESULTS

### 87 Cell-to-cell variation in virus gene expression.

88 To determine how both the viral and host cell transcriptional programs relate to each other over  
89 the course of an influenza infection, we infected two cell types—the adenocarcinomic human  
90 alveolar basal epithelial A549 cell line and human primary bronchial epithelial cells HBEpC—at  
91 high multiplicity of Infection (MOI) with A/Puerto Rico/8/34(H1N1) (PR8) and performed single  
92 cell and bulk RNA-seq expression analyses. A high MOI infection ensures that virtually all the  
93 cells can be rapidly infected, promotes the accumulation of DVGs, and consequently enables  
94 the characterization of both host response and DVG diversity. We first determined the  
95 percentage of reads that uniquely aligned to viral genes from the total number of mapped reads  
96 to obtain the relative abundance of virus transcripts within cells at each time point. Similar to  
97 what has been observed at early stages of infection during a low MOI infection of IAV [9], the  
98 relative abundance of viral transcripts was heterogeneous across cells from both cell types, with  
99 0 to 70% of the total reads in each cell being derived from viral transcripts, with the relative  
100 abundance of these transcripts increasing over time (**Supplementary Fig. 1a**). The same trend  
101 was also seen when analyzing segment-specific viral transcripts within individual cells over the  
102 course of the infection (**Supplementary Fig. 1b**).

103

### 104 Heterogeneity of defective virus segment expression across the cell population.

105 Since DVGs are known to accumulate in cell culture and can serve as templates for  
106 transcription, we characterized their abundance and diversity by examining gap-spanning reads  
107 in the sequencing data. As the large majority of DVGs in IAV originate from the polymerase  
108 segments (i.e., PB2, PB1, and PA) [15], we focused on the detection of DVG transcripts derived  
109 from those segments. We collected the reads with large internal deletions spanning  $\geq 1000$   
110 nucleotides (nt) (**Fig. 1a**) and identified the junction coordinates of these gap-spanning reads.  
111 We observed a diverse pool of DVG transcripts, including some shared with the viral segments

112 (vRNA) from the PR8 stock (**Supplementary Fig. 2-4**). The sizes of the majority of these DVG  
113 transcripts are estimated to be between 300nt and 1000nt.

114

115 To quantify the relative abundance of DVGs identified, we calculated the frequency of each  
116 unique DVG transcript type (determined by 5' / 3' gap coordinates) across single cells and the  
117 ratio of these to non-gap-spanning transcripts derived from the corresponding viral segments  
118 (i.e., DVG/FL ratio). The DVG/FL ratio, which represents the ratio of DVG transcripts to that of  
119 the full-length (FL) transcripts, derived from a given polymerase segment increased significantly  
120 between the early (6hpi) and late (24hpi) stages of the infection ( $p < 2.2 \times 10^{-16}$ ) and displayed a  
121 high level of heterogeneity across single cells from both cell types (**Supplementary Fig. 5**).  
122 Interestingly, the junction sites aggregated in specific genomic regions, as they systematically  
123 occurred in a high percentage of cells. We identified two predominant types of DVG transcripts  
124 corresponding to PB2 and PB1 defective segments (**Fig. 1b-c** and **Supplementary Fig. 6-7**).  
125 These same DVG transcripts were present in the stock, increased in prevalence over the course  
126 of the infection, and were conserved in different cell types and at different MOIs,  
127 (**Supplementary Fig. 8-9**) indicating likely carryover from the stock virus rather than *de novo*  
128 formation in each new cell type. For PA, one particular DVG type that was present in the stock  
129 was found in A549 and MDCK cells at different MOIs, but not in HBEpC cells. Its prevalence  
130 was also much lower than for PB2 and PB1 DVGs (**Supplementary Fig. 10-11**). The dominant  
131 DVG PB2 and PB1 transcripts derived from corresponding defective segments in both the stock  
132 and the infected cells showed stable relative abundance across individual cells over the course  
133 of the infection, suggesting the persistence of the defective viral segments.

134

135 To determine if any of the inferred defective polymerase segments could lead to the generation  
136 of defective interfering particles (DIs), we tested their interfering potential experimentally. We  
137 generated clonal PB8-DI162 and PR8-DI222 viruses carrying the deletion sites in the PB2

138 segment identified as those in two dominant PB2-DVG species and then co-infected each of the  
139 DI viruses with PR8 wild-type (WT) virus in A549 cells. Both PR8-DI162 and PR8-DI222 viruses  
140 can inhibit the productivity of WT virus, comparable to the interfering ability of PR8-DI244 that is  
141 known to be an effective DI [18] (**Fig. 1d**). This confirmed the interfering ability of the two types  
142 of defective PB2 segments identified in the single cell data.

143

#### 144 **Differential expression of host genes linked to defective viral genomes**

145 Viral infection can trigger massive changes in the host transcriptional program, including the  
146 activation of the interferon (IFN) response. Since the induction of IFNs is also subject to cell-to-  
147 cell variation [22], we first evaluated the expression frequency of type I (i.e., IFN beta) and III  
148 (i.e., IFN lambda) IFNs to determine the extent of the variation during infection. While these  
149 were significantly differentially expressed over the course of the infection at the population level,  
150 as measured by bulk RNA-seq (**Fig. 2a**), the expression of IFNs was only detected in less than  
151 3% of cells until the late stage of infection, although this proportion increased over time (**Fig. 2b**  
152 and **Fig. 2c**). The same expression profile was observed for a number of IFN-stimulated genes  
153 (ISGs), such as *RSAD2*, *CXCL10*, *GBP4*, *GBP5*, *IDO1*, and *CH25H* in A549 cells, and *IFI44L*,  
154 *CMPK2*, *IFIT1*, *BST2*, *OASL*, and *XAF1* in HBEpC (**Fig. 2**). In silico pooling of the single cell  
155 data to mimic the population level measurement resembles the bulk RNA-seq data, thus  
156 excluding the possibility of substantial technical limitation of single-cell RNA-seq  
157 (**Supplementary Fig. 12**).

158

159 To evaluate cell-to-cell variation in the host response manifested by the alteration in the host  
160 transcriptome following IAV infection, we performed un-supervised cell clustering using the host  
161 transcriptional profile. We then annotated single cells in each subpopulation with information  
162 about the relative abundance of viral transcripts and the DVG/FL ratio. We detected significant  
163 effects of viral transcription on the host transcriptome, as cells with a high level of viral



164 transcription formed a separate cluster by 12hpi in both cell types (**Fig. 3a** and **Fig. 3b**), while  
165 the other cells clustered primarily according to their cell cycle stage (**Supplementary Fig. 13a**  
166 and **Supplementary Fig. 13b**). Consistent with previous reports on G0/G1 cell-cycle arrest [23,  
167 24], the most drastic alteration in cell-cycle distribution was observed in A549 cells at 24hpi,  
168 when the host gene expression pattern varied along a gradient based on the relative abundance  
169 of viral transcripts (**Fig. 3a**).

170

171 To characterize the host genes driving the changes associated with viral transcription, we  
172 assessed the over-representation of Gene Ontology (GO) terms associated with differentially  
173 expressed genes in each subpopulation of A549 and HBEpC cells compared to the rest of the  
174 cells at 24hpi. In two subpopulations of A549 cells with a high relative abundance of viral  
175 transcripts (clusters 0 and 1 in **Fig. 4a**), there is enrichment of genes involved in transcription,  
176 RNA processing, translation, SRP-dependent co-translational protein targeting to the membrane,  
177 mitochondrial electron transport and ATP synthesis (**Fig. 4a**). These GO terms are also  
178 associated with genes highly expressed in HBEpC cells with the highest level of viral  
179 transcription at 24hpi (cluster 3 in **Fig. 4b**;  $p < 2.2 \times 10^{-16}$  compared to the other clusters). In  
180 contrast, genes involved in antiviral responses, such as the type I IFN signaling pathway and  
181 the negative regulation of viral genome replication, are over-expressed in the other two  
182 subpopulations of A549 cells with a similar or severely reduced relative abundance of viral  
183 transcripts (clusters 3 and 2, respectively in **Fig. 4a**). However, some antiviral genes are  
184 differentially induced in cells with different levels of viral transcription. For example, type I and III  
185 IFNs, as well as a subset of ISGs, are over-expressed in cluster 3, and another subset of ISGs  
186 are over-expressed in cluster 2. In HBEpC cells, the antiviral responses, such as the type I IFN  
187 signaling pathway, are primarily observed in a cluster (cluster 2 in **Fig. 4b**) that has a low level  
188 of viral transcription (**Fig 3b** at 24hpi) and mostly comprised of cells in the G0/G1 phase  
189 (**Supplementary Fig. 13b** at 24hpi).

190  
191 Since DVGs are known to play an important role in IFN induction and inhibition of viral  
192 replication (reviewed in [20]), we determined whether the accumulation of DVGs was associated  
193 with attenuated viral transcription and induction of innate immune antiviral response genes. We  
194 observed an inverse trend between the relative abundance of viral transcripts and the  
195 accumulation of defective PB2 and PB1 segments at the mid (12hpi) and late (24hpi) stages of  
196 infection (**Fig. 5a-f**). The cluster of cells with the highest level of viral transcription (cluster 1 of  
197 A549 cells at 12hpi in **Fig. 5a** and cluster 3 of HBEpC cells at 24hpi in **Fig. 5b**) has the lowest  
198 level of PB2 and PB1 DVG/FL ratios (**Fig. 5c-d**;  $p < 2.2 \times 10^{-16}$  comparing PB2 and PB1  
199 DVG/FL ratios in cluster 1 of A549 cells or cluster 3 of HBEpC cells against the other clusters).  
200 Similarly, in A549 cells at 24 hpi, we see the lowest level of viral transcription in cells (cluster 2  
201 in **Fig. 5e**) that have a higher level of PB2 DVG/FL ratios (cluster 2 in **Fig. 5f**;  $p < 2.2 \times 10^{-16}$   
202 compared to clusters 0 and 1) and the highest level of PB1 DVG/FL ratios ( $p = 1.943 \times 10^{-9}$   
203 comparing cluster 2 against the other clusters). Moreover, given the fact that the innate immune  
204 response genes are highly expressed in cells with an elevated relative abundance of both DVG  
205 PB2 and PB1 transcripts (cluster 2 of A549 cells at 24 hpi in **Fig. 5f**), or just DVG PB2  
206 transcripts (cluster 3 in **Fig. 5f**;  $p = 4.036 \times 10^{-11}$  compared to clusters 0 and 1), it suggests an  
207 association between the accumulation of DVGs and the strong stimulation of the innate immune  
208 response compared to the rest of the cells in the same population, where secreted IFNs are  
209 accessible to all the cells. Notably, the DVG PB2 transcripts carrying the same deletion sites as  
210 for PR8-DI222 were highly abundant in the cluster of cells with the lowest level of viral  
211 transcription (cluster 2 of A549 cells at 24 hpi in **Fig. 5g**;  $p < 2.2 \times 10^{-16}$  compared to the other  
212 clusters), while the other DVG PB2 transcripts corresponding to PR8-DI162 were highly  
213 abundant in both cluster 2 and cluster 3 (**Fig. 5g**;  $p = 2.067 \times 10^{-10}$  and  $p = 0.001241$ ,  
214 respectively, compared to clusters 0 and 1), suggesting a potential difference in the induction of  
215 innate immune response genes by different DVG species. We did not detect a difference in the

216 relative abundance of defective PA segments among cells with different levels of viral  
217 transcription (**Supplementary Fig. 14**).

218

219 To further understand how transcriptional activity is coordinated in clusters of cells that confront  
220 different levels of viral stimuli, including DVGs, we performed gene co-expression network  
221 analyses using multiscale embedded gene co-expression network analysis (MEGENA) [25].  
222 This was done independently within each cluster of A549 and HBEpC cells collected at 24 hpi to  
223 identify modules of co-expressed genes representing coherent functional pathways. The  
224 relevance of a module to viral infection in terms of the host response and viral replication was  
225 evaluated by the enrichment of differentially expressed disease gene (DEDG) signatures  
226 compared to the mock-infected cells and by correlating with the relative abundance of viral  
227 transcripts and DVG/FL ratios. Consistent with the processes identified in the GO over-  
228 representation test (**Fig. 4**), those related to the host cell cycle and viral life cycle, especially at  
229 the late stage of viral replication, including protein synthesis and transport, are enriched in the  
230 top-ranked modules identified in the clusters of A549 cells with a high level of viral transcription  
231 (**Fig. 6a, Supplementary Fig. 15a and 15b**). Conversely, the host innate immune response  
232 (e.g., type I IFN signaling pathway) was primarily associated with several top-ranked modules in  
233 cells with the lowest level of viral transcription (cluster 2 of A549 cells at 24hpi in **Fig. 6b**) and in  
234 high IFN-producing cells with a high level of viral transcription (cluster 3 of A549 cells at 24hpi in  
235 **Fig. 6a**). For example, module M100 in cluster 2 of A549 cells had key regulators involved in the  
236 innate antiviral response that were significantly up-regulated, compared to the mock-infected  
237 cells, including *ISG20*, *RNF213*, *IFI35*, *STAT1*, and *RBCK1* (**Fig. 6b**) and showed a strong  
238 negative correlation with the level of viral transcription ( $\rho = -0.26$ ,  $p = 2.9 \times 10^{-5}$ ); and Module M3  
239 in cluster 3 of A549 cells had key regulators including *IFNL1* and some ISGs (e.g., *OASL* and  
240 *ISG15*) (**Fig. 6a**). A top-ranked module associated with the type I IFN signaling pathway was  
241 also observed in cluster 1 of A549 cells with a high level of viral transcription (M13 in

242 **Supplementary Fig. 15b)** and it shared a common key regulator, *ISG15*, with the other IFN  
243 signaling modules detected in clusters 2 and 3 (**Supplementary Fig. 15c and Fig. 6a**).  
244 However, a top-ranked module (M234 in **Supplementary Fig. 15c**) enriched for the chemokine-  
245 mediated signaling pathway, particularly the regulation of granulocytes (e.g., neutrophils)  
246 chemotaxis, was observed in another cluster of A549 cells with a high level of viral transcription  
247 (i.e., cluster 0). Nonetheless, in HBEpC cells, top-ranked modules enriched for type I IFN  
248 signaling genes were detected in all four clusters of cells with different levels of viral  
249 transcription (**Fig. 6c and Supplementary Fig. 16**). These modules in three clusters of HBEpC  
250 cells with a low level of viral transcription (i.e., clusters 0, 1, and 2 in **Fig. 6c** and  
251 **Supplementary Fig. 16**), including Module M227 in cluster 2 of HBEpC cells with a significant  
252 positive correlation with the level of viral transcription ( $p = 0.10$ ,  $p = 0.021$ ) (**Fig. 6c**), also shared  
253 the same key regulator, *ISG15*, as observed in A549 cells.

254  
255 Given the presence of PB2 DVGs in cluster 2 of A549 cells, and the association in that cluster  
256 between module M100 and the over-expression of ISGs compared to the rest of the cells in the  
257 same population as well as to mock-infected cells, we experimentally validated the  
258 immunostimulatory impact of PB2 DVGs on the host cells. We infected A549 cells with each of  
259 our 3 PR8-DIs (PR8-DI162, -DI222, or -DI244) or with WT virus, and quantified the expression  
260 level of ISGs that were shown to be significantly up-regulated in cluster 2 of A549 cells,  
261 including *IFI35*, *IFI27*, and *MX1*, as well as type I and III IFNs that were shown to be significantly  
262 up-regulated in cluster 3 of A549 cells (**Supplementary Fig. 17a and 17b**). At 24hpi, we  
263 observed a higher induction of the ISGs in DI-infected cells compared to cells infected with WT  
264 virus, while a generally higher induction of IFN beta (IFNB) and IFN lambda (IFNL) was  
265 observed in the WT-infected cells (**Supplementary Fig. 17c**). Together, these data  
266 demonstrated that PB2 DVGs have a strong immunostimulatory effect on the host cells,  
267 manifested by a significant induction of ISGs at the late stage of the infection.

268 **DISCUSSION**

269 The goal of this study was to quantitatively and qualitatively characterize viral and host factors  
270 that contribute to cell-to-cell transcriptional variation observed during IAV infection. We identified  
271 DVGs as potentially important factors in the temporal variation of the host cell transcriptome.  
272 The substantial cell-to-cell variation in viral replication and host response that we detected  
273 highlight the potential of single-cell virology to provide novel insight into complex virus-host  
274 interactions.

275

276 The inherent stochasticity of molecular processes, especially during the initial stages of infection,  
277 can contribute to the cell-to-cell variation in viral replication [1]. Evidence from studies examining  
278 low MOI infections with different virus strains and cell lines suggests that this intrinsic  
279 stochasticity can impact viral replication and result in the loss of viral genome segments,  
280 transcripts, or proteins [1, 8-10]. Similarly, at different time points of the high MOI infection, we  
281 observed cell-to-cell variation in viral transcription, including that in segment-specific  
282 transcription. Although the mechanisms leading to this observation are unclear based on our  
283 data, it may be explained by the following possibilities as discussed in [10], including (i) the  
284 absence of one or more viral genome segments in infecting virions, (ii) a deficiency in  
285 intracellular trafficking of incoming viral ribonucleoprotein complexes (vRNPs), (iii) the random  
286 degradation of vRNAs prior to transcription, or (iv) mutations resulting in decreased stability of  
287 viral mRNAs.

288

289 Another source of variability in viral replication stems from the emergence and accumulation of  
290 various vRNA species synthesized by the error-prone viral polymerase. Indeed, viral genetic  
291 diversity, including amino acid mutations in the NS1 and PB1 proteins, the absence of the NS  
292 gene, and an internal deletion in the PB1 gene, contributes to the cell-to-cell variation in the  
293 innate immune response as shown in a recent report of low MOI infection [26]. Although the 3'

294 sequencing strategy employed in our study hinders the identification of mutations in the full-  
295 length segments, our experimental setup provides a unique opportunity to evaluate the diversity  
296 of DVGs by characterizing the DVG transcripts, since a high MOI infection promotes the  
297 accumulation of DVGs. Late stages of infection also emphasize the impact of accumulated  
298 DVGs on the host response. We identified a diverse pool of DVG transcripts derived from the 3  
299 polymerase segments, including several dominant species. Notably, the fact that all the  
300 dominant DVG PB2 and PB1 transcripts identified in the infected cells were also present in the  
301 virus stock, and that the dominant DVG PB1 transcripts were detected in an increasing  
302 proportion of cells over the course of infection, suggests potential transmission of DI viruses  
303 carrying these DVGs, although the possibility that the regions where the hot spots were located  
304 are most prone to polymerase skipping cannot be ruled out.

305

306 The accumulation of DVGs can have consequences on viral replication by directly competing  
307 with the full-length genomes and modulating host innate immune responses. The immune-  
308 modulatory effect of DVGs has been attributed to efficient activation of the IFN induction  
309 cascade and antiviral immunity, a mechanism well-known for the non-segmented negative-  
310 sense RNA viruses, such as the murine parainfluenza virus Sendai (SeV) (reviewed in [20]).  
311 Consistent with previous reports, we detected enrichment of highly expressed genes involved in  
312 the IFN response in one subpopulation of cells with significantly attenuated viral transcription; In  
313 this cluster of cells we also observed that DVG transcripts accumulated to significantly higher  
314 levels. The co-expression network analysis provides us an opportunity to identify modules of co-  
315 expressed host genes and directly correlate them with viral factors, such as the level of viral  
316 transcription and DVG accumulation, and enables us to identify groups of innate response  
317 genes that are potentially differentially expressed under the effect of viral factors. The  
318 observation was further validated in our DI- or WT- infection assay, in which we detected a  
319 significantly higher expression of some ISGs in DI-infected cells and that of IFNs in WT-infected

320 cells at the late stage of the infection. Given the fact that some ISGs could be highly expressed  
321 in cells with a high level of viral transcription or a high level of DVGs suggests that other viral  
322 factors, besides the accumulation of DVGs, may also play an important role in triggering the  
323 innate immune response. Nevertheless, unlike SeV DVGs that form “copy-back” structures due  
324 to complementary termini generated by “copying back” the authentic 5’ terminus at the 3’  
325 terminus [27, 28], IAV DVGs share identical termini with the full-length genomes. In the copy-  
326 back SeV DVGs, a stretch of dsRNA adjacent to a 5’-triphosphate serves as an effective RIG-I  
327 ligand [20]; however, the mechanism of IAV DVGs underlying a more effective  
328 immunostimulation compared to the full-length genomes remains elusive [20]. A proposed  
329 hypothesis is that the unencapsidated replication products of small DVGs can potentially  
330 activate RIG-I if they can reach the cytoplasm [20], given the observations *in vitro* and *in vivo* of  
331 short influenza RNA template replication in the absence of nucleoprotein (NP) [29]. In addition,  
332 the interfering and immune-modulatory abilities of DVGs could also be attributed to DVG-  
333 encoded proteins that directly interact with mitochondrial antiviral-signaling (MAVS) and act  
334 independently of RIG-I in IFN induction, as previously reported [30].

335  
336 Our approach enables us to distinguish DVG species accumulated in individual cells and  
337 associate the enrichment of certain DVG species with attenuated viral transcription and the  
338 induction of innate immune responses with single cell resolution. The accumulation of one type  
339 of dominant PB2-DVG (PR8-DI222) in one subpopulation of cells was associated with a strong  
340 host innate immune response manifested by over-expression of some ISGs, although the  
341 accumulation of other non-dominant defective PB2-DVGs, DVGs derived from other polymerase  
342 segments, and certain mutations in stimulating host responses could also have occurred.  
343 Considering the significantly attenuated viral transcription in the subpopulation of cells where  
344 PR8-DI222 was enriched, the different ability to induce innate immune responses is likely to  
345 provide an explanation for the distinct effects of the DVG species. However, further investigation

346 is necessary to pinpoint causal relationships and identify the specific mechanism by which this  
347 happens. Our characterization of DVGs and corresponding host responses reveals complex  
348 virus-host interactions and an underappreciated single-cell level of immune-modulation by  
349 DVGs. The complex gene expression pattern underlying the host innate immune response  
350 demonstrates the intricate effects of various viral factors, including—but probably not limited  
351 to—the accumulation of DVGs, on shaping infection outcome at the single-cell level.



## 352 **MATERIALS AND METHODS**

### 353 **Cells and virus**

354 Human lung adenocarcinoma epithelial A549 cells (ATCC, Virginia, USA) were maintained in  
355 Kaighn's modified Ham's F-12 medium (F-12K) supplemented with 10% fetal bovine serum  
356 (FBS). Primary human bronchial epithelial cells (HBEpC) (PromoCell, Heidelberg, Germany)  
357 were maintained in PromoCell airway epithelial cell growth media with SupplementMix  
358 (PromoCell). Madin-Darby canine kidney (MDCK) cells were maintained in minimum essential  
359 medium (MEM) supplemented with 5% FBS. Human embryonic kidney epithelial 293T cells  
360 (ATCC, Virginia, USA) were maintained in Dulbecco's Modified Eagle Medium (DMEM)  
361 supplemented with 10% FBS. PB2 protein-expressing modified MDCK (AX4/PB2) [31] cells  
362 were maintained in MEM supplemented with 5% Newborn Calf Serum (NBCS), 2 µg/ml  
363 puromycin and 1 µg/ml blasticidin. 293T and AX4/PB2 cells were co-cultured with DMEM  
364 supplemented with 10% FBS. Viral strain A/Puerto Rico/8/34 (H1N1) was plaque purified and  
365 propagated in MDCK cells. Viral titers were determined by plaque assay in MDCK cells and  
366 sequences confirmed by Illumina MiSeq sequencing.

367

### 368 **Infection assays**

369 Subconfluent monolayers of A549 cells in T-25 flasks were washed with A549 infection media  
370 (F-12K supplemented with 0.15% bovine serum albumin (BSA) fraction V and 1% antibiotic-  
371 antimycotic) and infected with influenza virus at a multiplicity of infection (MOI) of 5 in 0.5 mL  
372 pre-cooled A549 infection media. The flasks were incubated at 4°C for 30 minutes with agitation  
373 every 5-10 minutes followed by addition of 4.5 mL pre-warmed A549 infection media and  
374 transferred to a 37°C, 5% CO<sub>2</sub> incubator for further incubation. HBEpC cells were infected  
375 similarly except the HBEpC infection media was PromoCell airway epithelial cell growth media.  
376 The inoculum was back-titrated to confirm the desired MOI was used. The virus-infected cells

377 were collected at 6, 12, and 24 hours post infection (hpi) and the mock-infected cells were  
378 collected at 12 hpi. Cells were extensively washed before re-suspension in PBS containing 0.04%  
379 BSA. A proportion of cells from one of the two duplicate flasks per time point were subject to  
380 10X Genomics Chromium single-cell library preparation. The remaining cells in the two flasks  
381 were used for conventional bulk RNA-seq library preparation. Notably, due to a failure in the  
382 single-cell library preparation for the PR8-infected HBEpC cells collected at 12hpi, we replaced  
383 this sample by repeating the same infection assay with HBEpC cells.

384

### 385 **Sample preparation, library construction, and sequencing**

386 10X Genomics single cell library preparation with Chromium 3' v2 chemistry was performed  
387 following the manufacturer's protocol. A range of 3,900-7,500 cells were used as input into each  
388 single cell preparation, with a median of ~3,353 cells (range 2,075-5,254) obtained following  
389 sequencing, as described below. Sequencing was performed on the HiSeq 2500 in HighOutput  
390 mode (v2) with one library per lane following the manufacturer's recommended sequencing  
391 configuration (i.e., paired-end read 1: 27 bp, read 2: 99 bp, and i7 index: 8 bp). An average of  
392 59,200 reads per cell were obtained. For bulk mRNA sequencing, total RNA from two replicate  
393 flasks per time point was extracted using RNeasy Mini Kit (Qiagen, Hilden, Germany) with on-  
394 column DNA digestion using RNase-free DNase (Qiagen). The conventional bulk RNA-seq  
395 library preparation was performed using NEBNext Ultra II RNA library prep kit for Illumina  
396 following poly(A) mRNA enrichment. Libraries were multiplexed and sequenced on an Illumina  
397 NextSeq 500 in HighOutput 2x75 bp mode (v3). Viral genomic RNA (vRNA) of the virus stocks  
398 used in the infection assay was amplified using multi-segment reverse-transcription PCR (M-  
399 RTPCR) [32]. The M-RTPCR product was subject to Illumina library preparation with Nextera  
400 DNA library prep kit and sequenced on the HiSeq 2500 in Rapid 2x150 bp mode (v2).

401

### 402 **Upstream computational analyses of single-cell RNA-seq data**

403 The Cell Ranger (v2.1.0) single cell software suite (10X Genomics) was applied to the single-  
404 cell RNA-seq data to perform the alignment to the concatenated human (hg19) and influenza A  
405 virus (A/Puerto Rico/8/34) reference with STAR (v2.5.3a) [33] and gene counting with the  
406 processed UMIs for each cell. The UMI counts for the viral reads with the CIGAR string  
407 containing a gap (i.e., “MNM”) and different UMI sequences comparing to the ungapped reads  
408 were added into the expression matrix later, since they were not considered during gene  
409 counting. Given the fact that we performed 3’-end sequencing, transcripts derived from  
410 alternative splicing of M and NS segments, encoding M1/M2 and NS1/NEP respectively, could  
411 not be distinguished in our analyses, as those transcribed from the same genes share the  
412 identical 3’-end.

413

414 To identify and exclude low quality cells in the single cell data from the downstream analyses,  
415 the following metrics were calculated for each sample and were employed to filter out cells that  
416 failed to meet these criteria: 1) remove cells with fewer than 2,000 detected genes; 2) remove  
417 cells with an alignment rate less than the mean minus 3 standard deviations; 3) remove cells  
418 with a number of reads after log<sub>10</sub> transformation not within 3 standard deviations below or  
419 above the mean; 4) remove cells with the number of UMI after log<sub>10</sub> transformation not within 3  
420 standard deviations below or above the mean; 5) remove cells with the percentage of reads  
421 aligned to mitochondrial genes not within 3 standard deviations below or above the mean; 6)  
422 remove mock-infected cells with 1 viral read detected. Although we filtered cells based on the  
423 size of the total mRNA pool (i.e., total reads) as one of the criteria described above, we also  
424 checked the distribution of the size of the host mRNA pool (i.e., host reads) for individual cells.  
425 As reported in recent virus-infected single cell studies [9, 34], while virus-induced host shutoff of  
426 gene expression [35] is likely to be mainly mediated by host mRNA degradation, it remains  
427 unclear what effect viral transcription has on the size of the total mRNA pools. In our study, we  
428 observed that virtually all the cells with substantially smaller or larger host mRNA pools—where

429 the number of host reads after log10 transformation was not within 3 standard deviations below  
430 or above the mean—were already being excluded when applying the 6 criteria described above,  
431 thus we decided to filter cells based on these. Approximately 120-250 cells were eliminated  
432 from each sample, with a median of 164 cells per sample. We further removed genes that were  
433 detected in fewer than three cells. After initial cell and gene quality control, the majority of  
434 samples had approximately 3,000-3,500 cells left for downstream analysis. The expression  
435 levels of host genes were normalized based on the size of the host mRNA pool.

436

### 437 **Cell clustering with Seurat**

438 An unsupervised cell clustering to identify subtle changes in the population structure after  
439 infection was performed on each time point data separately following the procedures of the  
440 Seurat package (v2.1.0) [36] using the normalized, scaled, and centered host gene expression  
441 matrix. Briefly, the highly variable genes with average expression  $< 4$  and dispersion  $> 1$  were  
442 used as input for the PCA. The statistically significant and biological meaningful PCs determined  
443 by the built-in jackstraw and elbow analyses and manually exploration were retained for  
444 visualization by t-distributed stochastic neighbor (t-SNE) and subsequent clustering by a shared  
445 nearest neighbor (SNN) graph-based approach. The legitimacy of the initially identified clusters  
446 was validated using the “ValidateClusters” function in Seurat, which built a support vector  
447 machine (SVM) classifier with significant PCs and then applied the accuracy cutoffs of 0.9 and  
448 the minimal connectivity threshold of 0.001. To identify markers that are differentially expressed  
449 among clusters, the “FindMarkers” function in Seurat was used with the different test options,  
450 including “bimod” [37], “poisson”, “negbinom”, and “MAST” (v1.4.1) [38]. Only the genes that  
451 showed at least 0.25-fold difference on the log-scale between two groups and were expressed  
452 in at least 25% of the cells in either group were tested for differential expression. Significantly  
453 differentially expressed genes for each cluster (i.e., the markers) were identified by applying the  
454 adjusted p-value cut-off of 0.05. Markers identified by all four methods were retained. GO term

455 over-representation analysis of the up-regulated markers was performed with the online service  
456 DAVID [39, 40] by applying the Benjamini p-value cut-off of 0.05. To determine the cell cycle  
457 stage associated with individual cells, cell-cycle scoring and assignment were performed with  
458 Seurat using the “CellCycleScoring” function based on the expression of canonical markers [41].

459

#### 460 **Computational analyses of bulk RNA-seq and virus stock sequencing data**

461 The raw bulk RNA-seq and virus stock sequencing data was first trimmed with trimmomatic  
462 (v0.36) [42] to remove the adaptors and trim off low quality bases. Reads with a minimal length  
463 of 36 bases in the trimmed bulk RNA-seq dataset were aligned to the concatenated human  
464 (hg19) and influenza A/Puerto Rico/8/34 (H1N1) reference with STAR (v2.5.3a) [33] with the  
465 default parameters, and counted with featureCounts [43] in the Subread package (v1.5.1) [44],  
466 while reads in the virus stock sequencing dataset were aligned to the influenza A/Puerto  
467 Rico/8/34 (H1N1) reference with STAR (v2.5.3a) [33]. Differential expression analysis was  
468 performed with DESeq2 (v1.18.1) [45] and edgeR (v3.20.5) [46, 47] using the bulk RNA-seq and  
469 the merged single-cell RNA-seq data. Host genes with the adjusted p-value < 0.05 were  
470 identified as significantly differentially expressed at each time point.

471

#### 472 **Deletion junction identification, filtering, and quantification**

473 Reads that aligned to both ends of the polymerase segments, and that contained large internal  
474 deletions (i.e.  $\geq 1000$  nucleotides, with each aligned portion of at least 10 nucleotides in length)  
475 were collected. Following UMI de-duplication, reads with junction coordinates within a 10-  
476 nucleotide window were grouped together. We excluded from downstream analyses reads with  
477 junction coordinates that occurred fewer than 10 times in each sample. To compare  
478 quantitatively gap-spanning reads for each segment across cells and samples, the number of  
479 gap-spanning reads was normalized to the total number of non-gap-spanning reads aligned to a  
480 100nt region centering the coverage peak at the 3' end. As cells with low infection (especially

481 those harvested at the early stage of infection or inoculated at a low MOI) typically have poor  
482 coverage for the viral segments of interest, the DVG/FL ratio in those cells calculated as  
483 described above is typically inflated and may even fail to be calculated because all the viral  
484 reads corresponding to a given segment are gap-spanning or there are no viral reads. To  
485 mitigate this effect, we overwrote those values to 0 in the datasets, including the dataset  
486 collected from HBEpC cells at 6hpi.

487

### 488 **Generation of PR8-derived DI162 and DI222 virus**

489 To generate the PR8 PB2-DI162, -DI222, and -DI244 reverse genetics plasmids, gBlocks Gene  
490 Fragments (Integrated DNA Technologies, California, USA) were ordered using the  
491 corresponding defective PB2 genomic sequences identified in this study (PR8-DI162 and PR8-  
492 DI222) or previously reported (DI244) [18] and cloned into the pBZ61A18 reverse genetics  
493 vector as previously described [48]. To rescue the PR8 DI viruses, each of the sequence  
494 confirmed PB2-DI plasmids was co-transfected into 293T-AX4/PB2 co-cultured cells with the 7  
495 reverse genetics plasmids for PR8 PB1, PA, HA, NP, NA, M, and NS and a PB2 protein-  
496 expression plasmid using Lipofectamine™ 3000 Transfection Reagent (Invitrogen, California,  
497 USA). The supernatant was collected on day 2 post-infection and passaged twice in the  
498 AX4/PB2 cell line, which expresses the PB2 protein in *trans* [31]. Viral titers were determined by  
499 TCID50 assay in AX4/PB2 cells.

500

### 501 **Interference test for PR8-DI162 and PR8-DI222 viruses and validation of their** 502 **immunostimulatory effects**

503 To test the interfering ability of PR8-DI162 and PR8-DI222 viruses that carry the deletions  
504 identified in two dominant PB2-DVG species from the single cell dataset, their inhibitory effects  
505 on wild type PR8 virus replication was quantified in cultured cells. Subconfluent monolayers of  
506 A549 cells in 12-well plates were washed with infection media (MEM supplemented with 0.15%

507 BSA fraction V, 1% antibiotic-antimycotic and 1 µg/mL TPCK-treated trypsin) and each well was  
508 co-infected with one type of DI virus at a MOI of 5 and the PR8 virus at a MOI of 0.005 in 1 mL  
509 infection media. Plates were transferred to a 37°C, 5% CO<sub>2</sub> incubator. At 2 hours post infection,  
510 and 1, 2, and 3 days post infection, supernatants were collected and wild type PR8 yield was  
511 determined by TCID<sub>50</sub> assay using MDCK cells, which do not support replication of DI viruses  
512 due to the lack of functional PB2 proteins.

513

514 To determine if the DI viruses could stimulate a higher expression of some ISGs identified in the  
515 network analysis, subconfluent monolayers of A549 cells in 12-well plates were infected with  
516 each DI virus (PR8-DI162, -DI222, or -DI244) or WT virus at a MOI of 10 in triplicate. Total RNA  
517 from cells collected at 24hpi was extracted using RNeasy Mini Kit (Qiagen, Hilden, Germany).  
518 100ng RNA was subsequently used as template for reverse transcription using SuperScript IV  
519 system (Invitrogen, California, USA) with Oligo d(T)<sub>20</sub> primer. qPCR was performed using  
520 PowerUp SYBR Green (Applied Biosystems, Massachusetts, USA) in triplicate with the  
521 following primers: IFI35: Hs.PT.58.38490206 (IDT, Iowa, USA); IFI27: IFI27fw (5'-  
522 GCCTCTGGCTCTGCCGTAGTT-3') and IFI27rev (5'-ATGGAGGACGAGGCGATTCC-3') [49];  
523 MX1: MX1fw (5'-CTTTCCAGTCCAGCTCGGCA-3') and MX1rev (5'-  
524 AGCTGCTGGCCGTACGTCTG-3') [49]; IFNB: IFNBfw (5'-TCTGGCACAACAGGTAGTAGGC-  
525 3') and IFNBrev (5'-GAGAAGCACAACAGGAGAGCAA-3') [50]; IFNL: IFNLfw (5'-  
526 GCCCCCAAAAAGGAGTCCG-3') and IFNLrev (5'-AGGTTCCCATCGGCCACATA-3') [50]; β-  
527 actin (ACTB): ACTBfw (5'-GAACGGTGAAGGTGACAG-3') and ACTBrev (5'-  
528 TTTAGGATGGCAAGGGACT-3') [51]. For all the targets, qPCR parameters according to  
529 manufacturer's recommendation were: 95°C for 10 min and then 45 cycles of 95°C for 15 s,  
530 57°C for 15 s, and 60°C for 60 s. Fold change of target gene expression was calculated using  
531 the  $2^{-\Delta\Delta C_T}$  method normalized to ACTB.

532

### 533 **Gene co-expression network analysis**

534 Multiscale Embedded Gene Co-Expression Network Analysis (MEGENA) [25] was performed to  
535 identify host modules of highly co-expressed genes in influenza infection. The MEGENA  
536 workflow comprises 4 major steps: 1) Fast Planar Filtered Network construction (FPFNC), 2)  
537 Multiscale Clustering Analysis (MCA), 3) Multiscale Hub Analysis (MHA), 4) and Cluster-Trait  
538 Association Analysis (CTA). A cutoff of 0.05 after perturbation-based FDR calculation was used.  
539 The total relevance of each module to influenza infection was calculated by summarizing the  
540 combined enrichment of the differentially expressed disease gene (DEDG) signatures:  $G_j =$   
541  $\prod_i g_{ji}$ , where,  $g_{ji}$  is the relevance of a module  $j$  to a signature  $i$ ; and  $g_{ji}$  is defined as  
542  $(\max_j(r_{ji}) + 1 - r_{ji}) / \sum_j r_{ji}$ , where  $r_{ji}$  is the ranking order of the significance level of the overlap  
543 between the module  $j$  and the signature  $i$ . Here, DEDGs are differently expressed genes  
544 between virus-infected cells of a particular cluster and the bulk of mock-infected cells  
545 determined by t-test. Only the genes that showed at least 0.25-fold difference on the log-scale  
546 between two groups and were expressed in at least 25% of the cells in either group were tested  
547 for differential expression. Significantly differentially expressed genes were identified by  
548 applying the adjusted p-value cut-off of 0.05.

549

### 550 **Identification of enriched pathways, key regulators in the host module, relative** 551 **abundance of virus transcripts as well as DVGs associated with host modules**

552 To functionally annotate gene signatures and gene modules identified in this study, enrichment  
553 analysis was performed of the established pathways and signatures—including the gene  
554 ontology (GO) categories and MSigDB—and the subject area-specific gene sets—including  
555 influenza host factors, Inflammasome, Interferome, and InnateDB. The hub genes in each  
556 subnetwork were identified using the adopted Fisher's inverse Chi-square approach in



557 MEGENA; Bonferroni-corrected p-values smaller than 0.05 were set as the threshold to identify  
558 significant hubs.

559

560 The relative abundance of virus transcripts and the DVGs associated with the host modules  
561 were identified using Spearman correlation between the first principal component of the gene  
562 expression in the corresponding module and the traits, including the relative abundance of each  
563 or total viral transcripts and the DVG/FL ratio. Significantly associated traits were identified  
564 using the Benjamini-Hochberg FDR-corrected p-value 0.05 as the cutoff.

565

## 566 **STATISTICAL ANALYSIS**

567 The statistical significance of the changes in the relative abundance of viral and DVG transcripts  
568 between 3 or more groups of cells was first determined by the one- or two- tailed Kruskal-Wallis  
569 rank sum test, followed by the one-tailed Wilcoxon rank sum test to calculate the pairwise  
570 comparisons. The statistical significance of expression fold changes in the qPCR validation  
571 assay was determined using the two-tailed Student's *t*-test. A p-value of  $\leq 0.05$  was considered  
572 statistically significant.

573

## 574 **CODE AVAILABILITY**

575 The code used to generate all the results is available on Github  
576 (<https://github.com/GhedinLab/Single-Cell-IAV-infection-in-monolayer>).

577

## 578 **DATA AVAILABILITY**

579 Sequencing data that support the findings of this study have been deposited in the Gene  
580 Expression Omnibus (GEO) repository with the accession codes GSE118773 (currently private  
581 record).

582

583 **ACKNOWLEDGEMENTS**

584 We thank members of the Ghedin laboratory for feedback and discussion. We thank Tara Rock,  
585 Nicholas Rouillard, Olivia Micci-Smith, and Mohammed Khalfan of the Genomics Core Facility at  
586 the Center for Genomics and Systems Biology, New York University for sequencing. We thank  
587 Yoshihiro Kawaoka for providing the AX4/PB2 cells and Peter Palese and Adolfo Garcia-Sastre  
588 for providing the PR8 RGs plasmids. This work was supported by NIAID/NIH U01 AI111598.  
589 This work was also supported in part through the NYU IT High Performance Computing  
590 resources, services, and staff expertise.

591

592 **AUTHOR CONTRIBUTIONS**

593 All authors read and approved the manuscript. E.G. conceived and designed the experiments,  
594 supervised research, and wrote the manuscript. B. Zhou conceived and designed the  
595 experiments, supervised research, performed the infection assays, and wrote the manuscript.  
596 C.W. performed the infection assays and bulk RNA-seq library preparation, analyzed the data,  
597 and wrote the manuscript. C.V.F. performed the network analysis and wrote the manuscript. T.C.  
598 performed the DI virus generation, interfering, and validation assay and wrote the manuscript.  
599 A.G. performed the library preparation for the virus stock. M.W. and B. Zhang contributed to  
600 data analyses. W.H., M.S., and R.S. performed the single-cell library preparation.

601

602

603 **REFERENCES**

- 604 1. Heldt FS, Kupke SY, Dorl S, Reichl U, Frensing T. Single-cell analysis and stochastic  
605 modelling unveil large cell-to-cell variability in influenza A virus infection. *Nature*  
606 *Communications*. 2015;6:8938.
- 607 2. Guo F, Li S, Caglar MU, Mao Z, Liu W, Woodman A, et al. Single-cell virology: On-chip  
608 investigation of viral infection dynamics. *Cell Reports*. 2017;21(6):1692-704.
- 609 3. Raj A, van Oudenaarden A. Nature, nurture, or chance: Stochastic gene expression and  
610 its consequences. *Cell*. 2008;135(2):216-26.
- 611 4. Lwoff A, Dulbecco R, Vogt M, Lwoff M. Kinetics of the release of poliomyelitis virus from  
612 single cells. *Virology*. 1955;1(1):128-39.
- 613 5. Zhu Y, Yongky A, Yin J. Growth of an RNA virus in single cells reveals a broad fitness  
614 distribution. *Virology*. 2009;385(1):39-46.
- 615 6. Timm A, Yin J. Kinetics of virus production from single cells. *Virology*. 2012;424(1):11-7.
- 616 7. Zanini F, Pu S-Y, Bekerman E, Einav S, Quake SR. Single-cell transcriptional dynamics  
617 of flavivirus infection. *eLife*. 2018;7:e32942.
- 618 8. Dou D, Hernandez-Neuta I, Wang H, Ostbye H, Qian X, Thiele S, et al. Analysis of IAV  
619 replication and co-infection dynamics by a versatile RNA viral genome labeling method. *Cell*  
620 *Reports*. 2017;20(1):251-63.
- 621 9. Russell AB, Trapnell C, Bloom JD. Extreme heterogeneity of influenza virus infection in  
622 single cells. *eLife*. 2018;7:e32303.
- 623 10. Brooke CB, Ince WL, Wrammert J, Ahmed R, Wilson PC, Bennink JR, et al. Most  
624 influenza A virions fail to express at least one essential viral protein. *Journal of Virology*.  
625 2013;87(6):3155-62.
- 626 11. Henle W, Henle G. Interference of inactive virus with the propagation of virus of  
627 influenza A. *Science*. 1943;98(2534):87-9.
- 628 12. von Magnus P. Incomplete Forms of Influenza Virus. *Advances in Virus Research*  
629 *Volume 2. Advances in Virus Research*1954. p. 59-79.
- 630 13. Davis AR, Nayak DP. Sequence relationships among defective interfering influenza viral  
631 RNAs. *Proceedings of the National Academy of Sciences of the United States of America*.  
632 1979;76(7):3092-6.
- 633 14. Nayak DP, Chambers TM, Akkina RK. Defective-Interfering (DI) RNAs of Influenza  
634 Viruses: Origin, Structure, Expression, and Interference. *Current Topics in Microbiology and*  
635 *Immunology*. 114. 1st ed. Berlin Heidelberg: Springer-Verlag; 1985. p. 103-51.
- 636 15. Saira K, Lin X, DePasse JV, Halpin R, Twaddle A, Stockwell T, et al. Sequence analysis  
637 of in vivo defective interfering-like RNA of influenza A H1N1 pandemic virus. *Journal of Virology*.  
638 2013;87(14):8064-74.
- 639 16. Vasilijevic J, Zamarreno N, Oliveros JC, Rodriguez-Frandsen A, Gomez G, Rodriguez G,  
640 et al. Reduced accumulation of defective viral genomes contributes to severe outcome in  
641 influenza virus infected patients. *PLoS Pathogens*. 2017;13(10):e1006650.
- 642 17. Dimmock NJ, Easton AJ. Defective interfering influenza virus RNAs: time to reevaluate  
643 their clinical potential as broad-spectrum antivirals? *Journal of Virology*. 2014;88(10):5217-27.
- 644 18. Dimmock NJ, Rainsford EW, Scott PD, Marriott AC. Influenza virus protecting RNA: an  
645 effective prophylactic and therapeutic antiviral. *Journal of Virology*. 2008;82(17):8570-8.
- 646 19. Baum A, Sachidanandam R, Garcia-Sastre A. Preference of RIG-I for short viral RNA  
647 molecules in infected cells revealed by next-generation sequencing. *PNAS*.  
648 2010;107(37):16303-8.
- 649 20. Killip MJ, Fodor E, Randall RE. Influenza virus activation of the interferon system. *Virus*  
650 *Research*. 2015;209:11-22.
- 651 21. Janda MJ, Davis AR, Nayak DP, De BK. Diversity and generation of defective interfering  
652 influenza virus particles. *Virology*. 1979;95(1):48-58.

- 653 22. Chen S, Short JA, Young DF, Killip MJ, Schneider M, Goodbourn S, et al. Heterocellular  
654 induction of interferon by negative-sense RNA viruses. *Virology*. 2010;407(2):247-55.
- 655 23. He Y, Xu K, Keiner B, Zhou J, Czudai V, Li T, et al. Influenza A virus replication induces  
656 cell cycle arrest in G0/G1 phase. *Journal of Virology*. 2010;84(24):12832-40.
- 657 24. Jiang W, Wang Q, Chen S, Gao s, Song L, Liu P, et al. Influenza A virus NS1 induces  
658 G0/G1 cell cycle arrest by inhibiting the expression and activity of RhoA protein. *Journal of*  
659 *Virology*. 2013;87(6):3039-52.
- 660 25. Song W-m, Zhang B. Multiscale embedded gene co-expression network analysis. *PLOS*  
661 *Computational Biology*. 2015;11(11):e1004574.
- 662 26. Russell AB, Kowalsky JR, Bloom JD. Single-cell virus sequencing of influenza infections  
663 that trigger innate immunity; 2018. Preprint. Available from: bioRxiv:  
664 <https://doi.org/10.1101/437277>. Cited Oct 7, 2018.
- 665 27. Re GG, Gupta KC, Kingsbury DW. Genomic and copy-back 3' termini in Sendai virus  
666 defective interfering RNA species. *Journal of Virology*. 1983;45(2):659-64.
- 667 28. Strahle L, Garcin D, Kolakofsky D. Sendai virus defective-interfering genomes and the  
668 activation of interferon-beta. *Virology*. 2006;351(1):101-11.
- 669 29. Turrell L, Lyall JW, Tiley LS, Fodor E, Vreede FT. The role and assembly mechanism of  
670 nucleoprotein in influenza A virus ribonucleoprotein complexes. *Nature Communications*.  
671 2013;4:1591.
- 672 30. Boergeling Y, Rozhdestvensky TS, Schmolke M, Resa-Infante P, Robeck T, Randau G,  
673 et al. Evidence for a novel mechanism of influenza virus-induced type I interferon expression by  
674 a defective RNA-encoded protein. *PLoS Pathogens*. 2015;11(5):e1004924.
- 675 31. Ozawa M, Victor ST, Taft AS, Yamada S, Li C, Hatta M, et al. Replication-incompetent  
676 influenza A viruses that stably express a foreign gene. *Journal of General Virology*.  
677 2011;92:2879-88.
- 678 32. Zhou B, Donnelly ME, Scholes DT, George KS, Hatta M, Kawaoka Y, et al. Single-  
679 reaction genomic amplification accelerates sequencing and vaccine production for classical and  
680 swine origin human influenza A viruses. *Journal of Virology*. 2009;83(19):10309-13.
- 681 33. Dobin A, Davis CA, Schlesinger F, Drenkow J, Zaleski C, Jha S, et al. STAR: ultrafast  
682 universal RNA-seq aligner. *Bioinformatics*. 2013;29(1):15-21.
- 683 34. Steuerman Y, Cohen M, Peshes-Yaloz N, Valadarsky L, Cohn O, David E, et al.  
684 Dissection of influenza infection in vivo by single-cell RNA sequencing. *Cell Systems*.  
685 2018;6(6):679-91 e4.
- 686 35. Bercovich-Kinori A, Tai J, Gelbart IA, Shitrit A, Ben-Moshe S, Drori Y, et al. A systematic  
687 view on influenza induced host shutoff. *eLife*. 2016;5:e18311.
- 688 36. Satija R, Farrell JA, Gennert D, Schier AF, Regev A. Spatial reconstruction of single-cell  
689 gene expression data. *Nature Biotechnology*. 2015;33(5):495-502.
- 690 37. McDavid A, Finak G, Chattopadhyay PK, Dominguez M, Lamoreaux L, Ma SS, et al. Data  
691 exploration, quality control and testing in single-cell qPCR-based gene expression experiments.  
692 *Bioinformatics*. 2013;29(4):461-7.
- 693 38. Finak G, McDavid A, Yajima M, Deng J, Gersuk V, Shalek AK, et al. MAST: a flexible  
694 statistical framework for assessing transcriptional changes and characterizing heterogeneity in  
695 single-cell RNA sequencing data. *Genome Biology*. 2015;16:278.
- 696 39. Huang DW, Sherman BT, Lempicki RA. Systematic and integrative analysis of large  
697 gene lists using DAVID Bioinformatics Resources. *Nature Protocol*. 2009;4(1):44-57.
- 698 40. Huang DW, Sherman BT, Lempicki RA. Bioinformatics enrichment tools: paths toward  
699 the comprehensive functional analysis of large gene lists. *Nucleic Acids Research*.  
700 2009;37(1):1-13.
- 701 41. Kowalczyk MS, Tirosh I, Heckl D, Rao TN, Dixit A, Haas BJ, et al. Single-cell RNA-seq  
702 reveals changes in cell cycle and differentiation programs upon aging of hematopoietic stem  
703 cells. *Genome Research*. 2015;25(12):1860-72.

- 704 42. Bolger A, Lohse M, Usadel B. Trimmomatic: a flexible trimmer for Illumina sequence  
705 data. *Bioinformatics*. 2014;30(15):2114-20.
- 706 43. Liao Y, Smyth G, Shi W. featureCounts: an efficient general purpose program for  
707 assigning sequence reads to genomic features. *Bioinformatics*. 2014;30(7):923-30.
- 708 44. Liao Y, Smyth G, Shi W. The Subread aligner: fast, accurate and scalable read mapping  
709 by seed-and-vote. *Nucleic Acids Research*. 2013;41(10):e108.
- 710 45. Love M, Huber W, Anders S. Moderated estimation of fold change and dispersion for  
711 RNA-seq data with DESeq2. *Genome Biology*. 2014;15:550.
- 712 46. Robinson M, McCarthy D, Smyth G. edgeR: a Bioconductor package for differential  
713 expression analysis of digital gene expression data. *Bioinformatics*. 2010;26(1):139-40.
- 714 47. McCarthy D, Chen Y, Smyth G. Differential expression analysis of multifactor RNA-seq  
715 experiments with respect to biological variation. *Nucleic Acids Research*. 2012;40(10):4288-97.
- 716 48. Zhou B, Wentworth DE. Influenza A Virus Molecular Virology Techniques. In: Kawaoka  
717 Y, Neumann G, editors. *Influenza Virus Methods in Molecular Biology (Methods and Protocols)*.  
718 865: Humana Press; 2012.
- 719 49. Cheon H, Holvey-Bates EG, Schoggins JW, Forster S, Hertzog P, Imanaka N, et al.  
720 IFN $\beta$ -dependent increases in STAT1, STAT2, and IRF9 mediate resistance to viruses and DNA  
721 damage. *EMBO Journal*. 2013;32(30):2751-63.
- 722 50. Zhou B, Li Y, Belser JA, Pearce MB, Schmolke M, Subba AX, et al. NS-based live  
723 attenuated H1N1 pandemic vaccines protect mice and ferrets. *Vaccine*. 2010;28(50):8015-25.
- 724 51. Mayanagi T, Morita T, Hayashi K, Fukumoto K, Sobue K. Glucocorticoid receptor-  
725 mediated expression of caldesmon regulates cell migration via the reorganization of the actin  
726 cytoskeleton. *Journal of Biological Chemistry*. 2008;283(45):31183-96.

727

728

729 **FIGURES**

Fig 1.

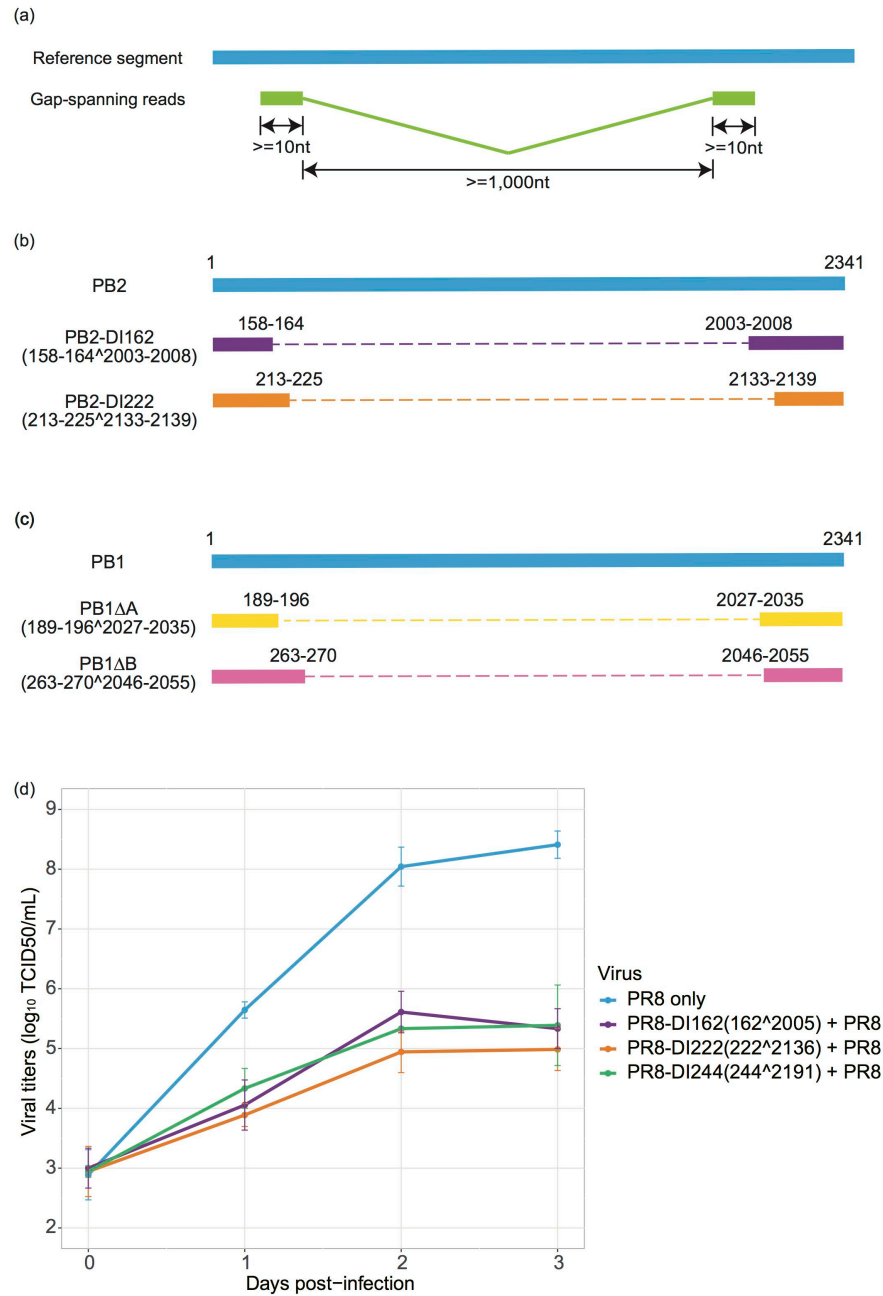

730

731 **Figure 1. Characterization of DVG transcripts and validation of interfering capacity. (a)**

732 Selection criteria for reads considered to be representatives of DVGs. Given the length of the

733 reads, we required that each portion of the gap-spanning reads were at least 10 bp in length.

734 Considering that DVGs typically lose approximately 80% of their original sequences, we also

735 required that the size of the gap should be at least 1 kb. **(b-c)** Schematic diagram showing two  
736 types of defective viral transcripts derived from **(b)** PB2 and **(c)** PB1 segments, respectively.  
737 The caret “^” denotes a deletion event and the numbers before and following it indicate the  
738 coordinates of the junction sites. **(d)** Interfering capacity of generated defective interfering  
739 particles (DIs) carrying identified deletion sites in the PB2 segment during co-infection with the  
740 WT-PR8 virus. A549 cells were co-infected with WT virus and one type of DI virus at a ratio of  
741 1:1000. Viral titers at 2 hours post-infection (denoted as day 0 post-infection) and 1 to 3 days  
742 post-infection (dpi) were measured by the TCID50 assay on MDCK cells. Three types of DI  
743 viruses were tested, including two DI viruses identified in this study and a previously reported  
744 DI244 virus [18] that has been considered as a potential candidate for antiviral therapy [17]. For  
745 each type of DI virus, the information about the junction sites was denoted in parentheses. The  
746 error bar representing the standard deviation of the mean was obtained from three biological  
747 replicates.  
748

Fig 2.

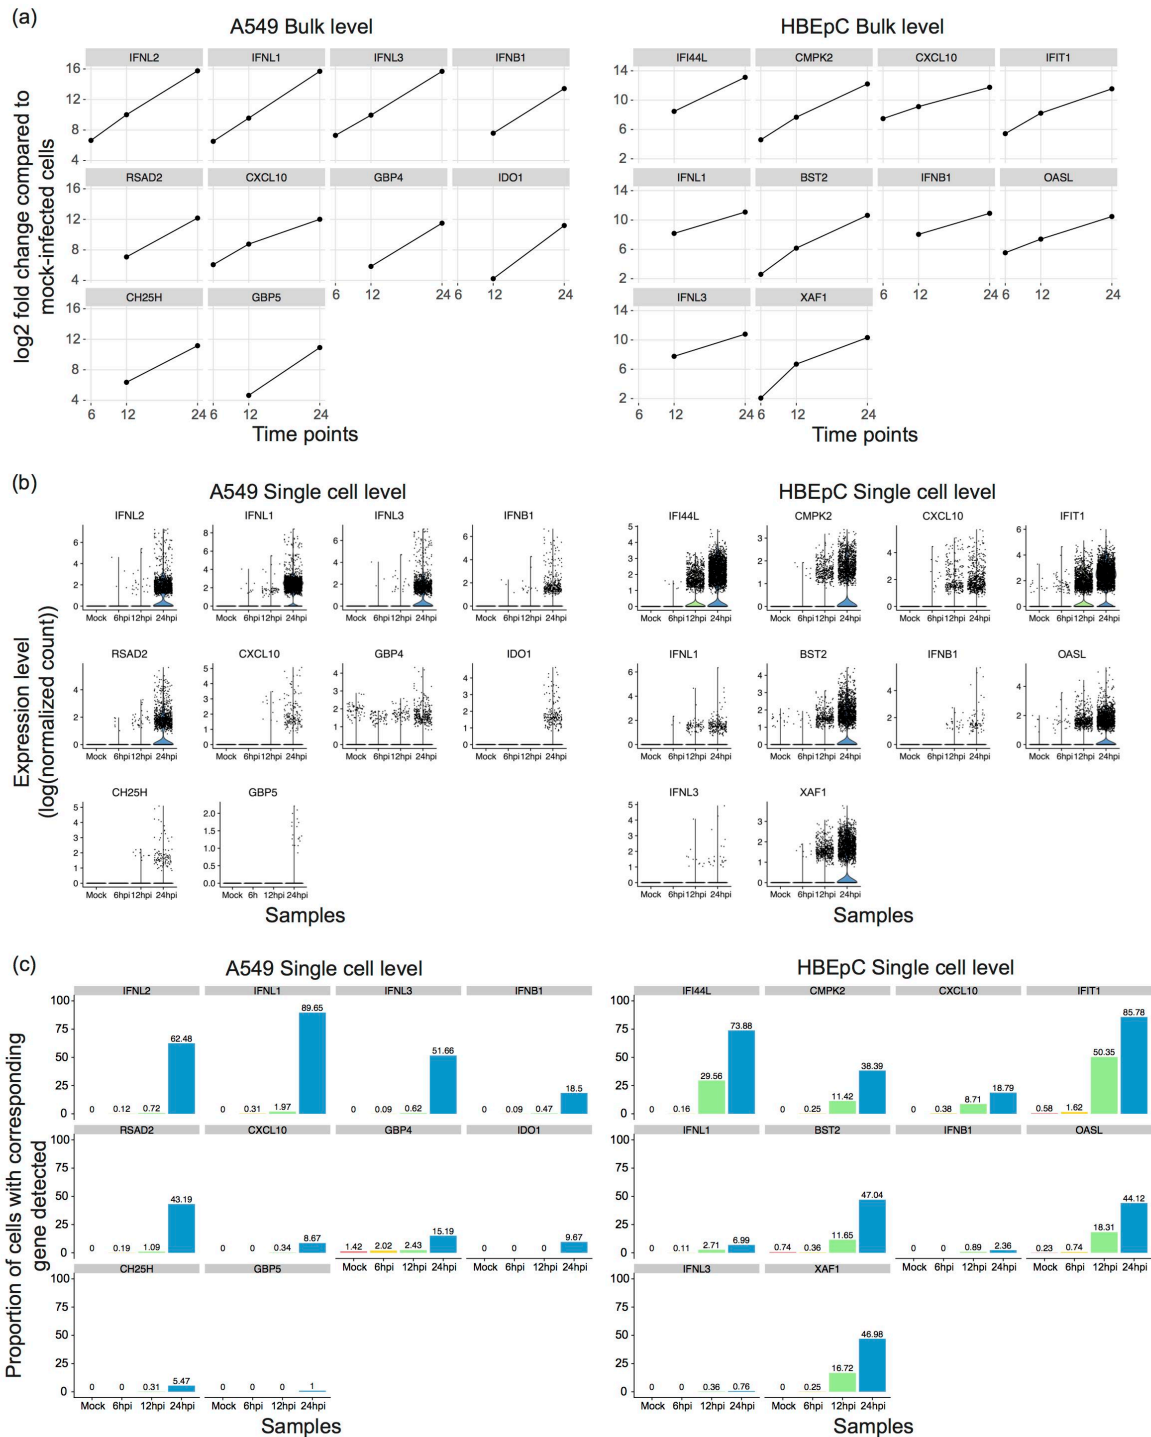

749

750 **Figure 2. Comparison of the induction of interferons (IFNs) and interferon-stimulated**

751 **genes (ISGs) at bulk and single-cell levels. (a) Log2 fold changes of the top 10 differentially**

752 **expressed genes with the greatest fold change by 24hpi, including type I and III IFNs and some**



753 ISGs, compared to mock-infected cells detected in A549 and HBEpC cells over the course of  
754 the infection at the bulk level. The results from edgeR are shown. **(b)** The expression of these  
755 genes at the single-cell level over the course of the infection in two cell types. Expression was  
756 calculated as log-transformed UMI counts normalized by the host library size. The violins below  
757 the dots are colored by samples. **(c)** Proportion of cells in which these genes are detected over  
758 the course of the infection in two cell types. The colors are consistent with those in panel (b).

Fig 3.

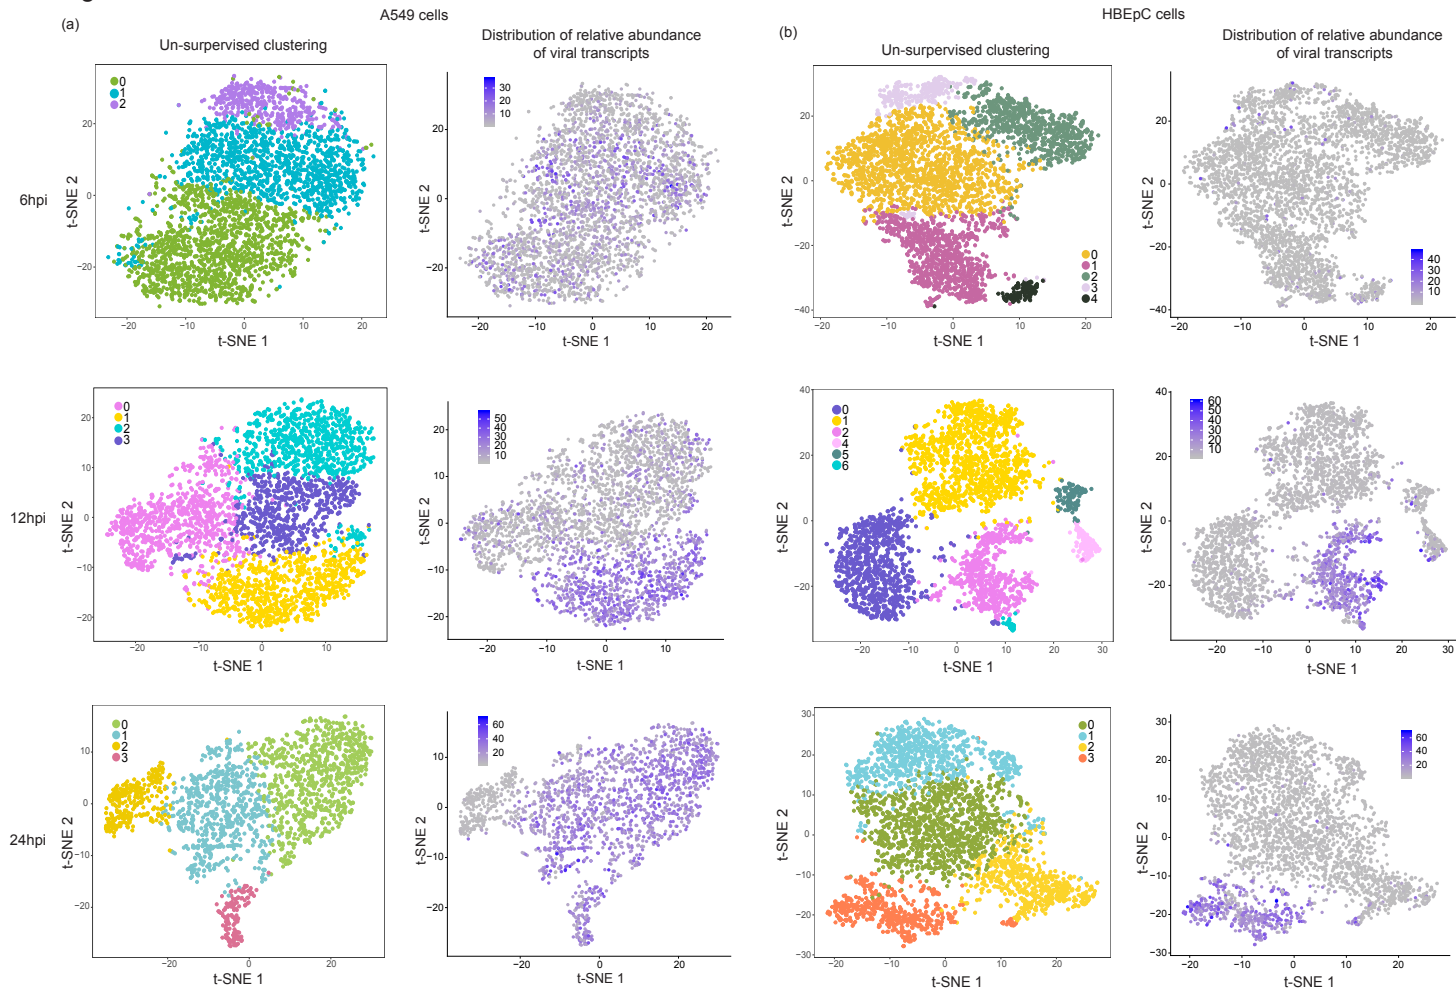

759

760 **Figure 3. Comparison of cell clustering patterns and the distribution of viral transcript relative abundance. PR8-infected (a)**

761 **A549 and (b) HBEpC cells harvested at each time point were subjected to un-supervised clustering based on the host transcriptome**

762 and visualized on a t-SNE plot. Each dot on a t-SNE plot represents a cell. Cell clustering patterns, in which cells were colored by  
763 their cluster identity, are shown in the left panels, and the distribution of the relative abundance of viral transcripts at different time  
764 points in individual cells is shown in the right panels.

Fig 4.

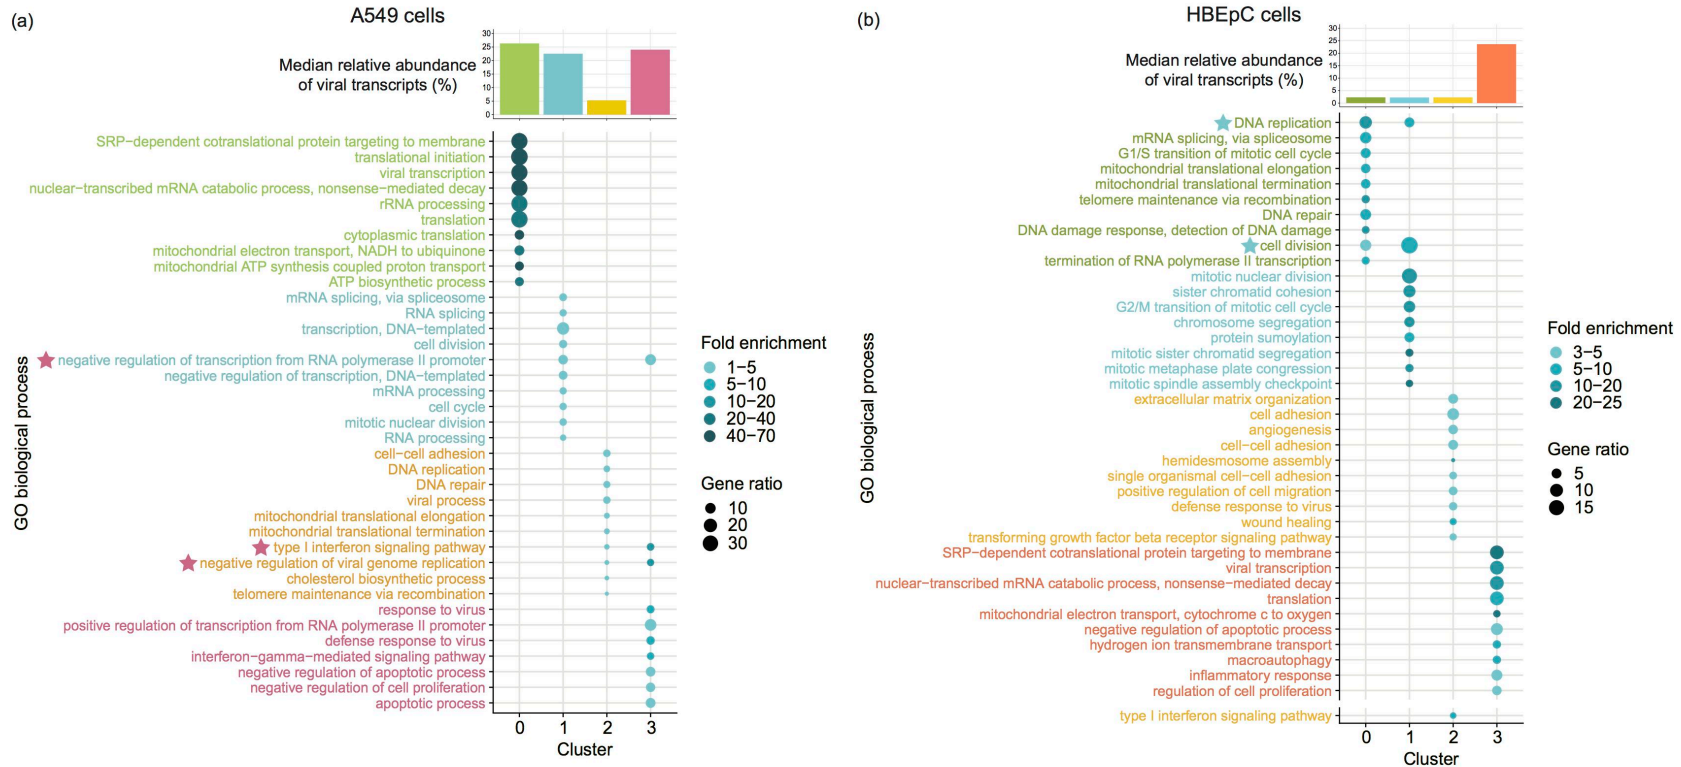

765

766 **Figure 4. Enriched biological process gene ontology (GO) terms in A549 cells at 24hpi. (a-b)** Biological process GO terms

767 associated with over-expressed genes in each cluster of (a) A549 and (b) HBEpC cells. The top 10 over-represented GO terms in

768 each cluster are shown in the upper panel and another over-represented GO term related to type I IFN signaling pathway in clusters

769 2 of HBEpC cells are shown in the lower panel. Redundant GO terms in HBEpC cells were collapsed. Each GO term is denoted by a

770 dot. The color intensity of each dot indicates the fold enrichment of the corresponding GO term and the size corresponds to the ratio

771 of queried genes in the gene set associated with a given GO term. The GO terms enriched in each cluster are color-coded by

772 clusters. The asterisks in the upper panel denote the GO terms enriched in two clusters and their colors indicate the identity of the  
773 other cluster besides the one denoted by the color of the GO term. The bar chart above the bubble chart of the GO terms shows the  
774 median relative abundance of the viral transcripts across cells in each cluster. The colors of the bar are consistent with that of the GO  
775 terms.

Fig 5.

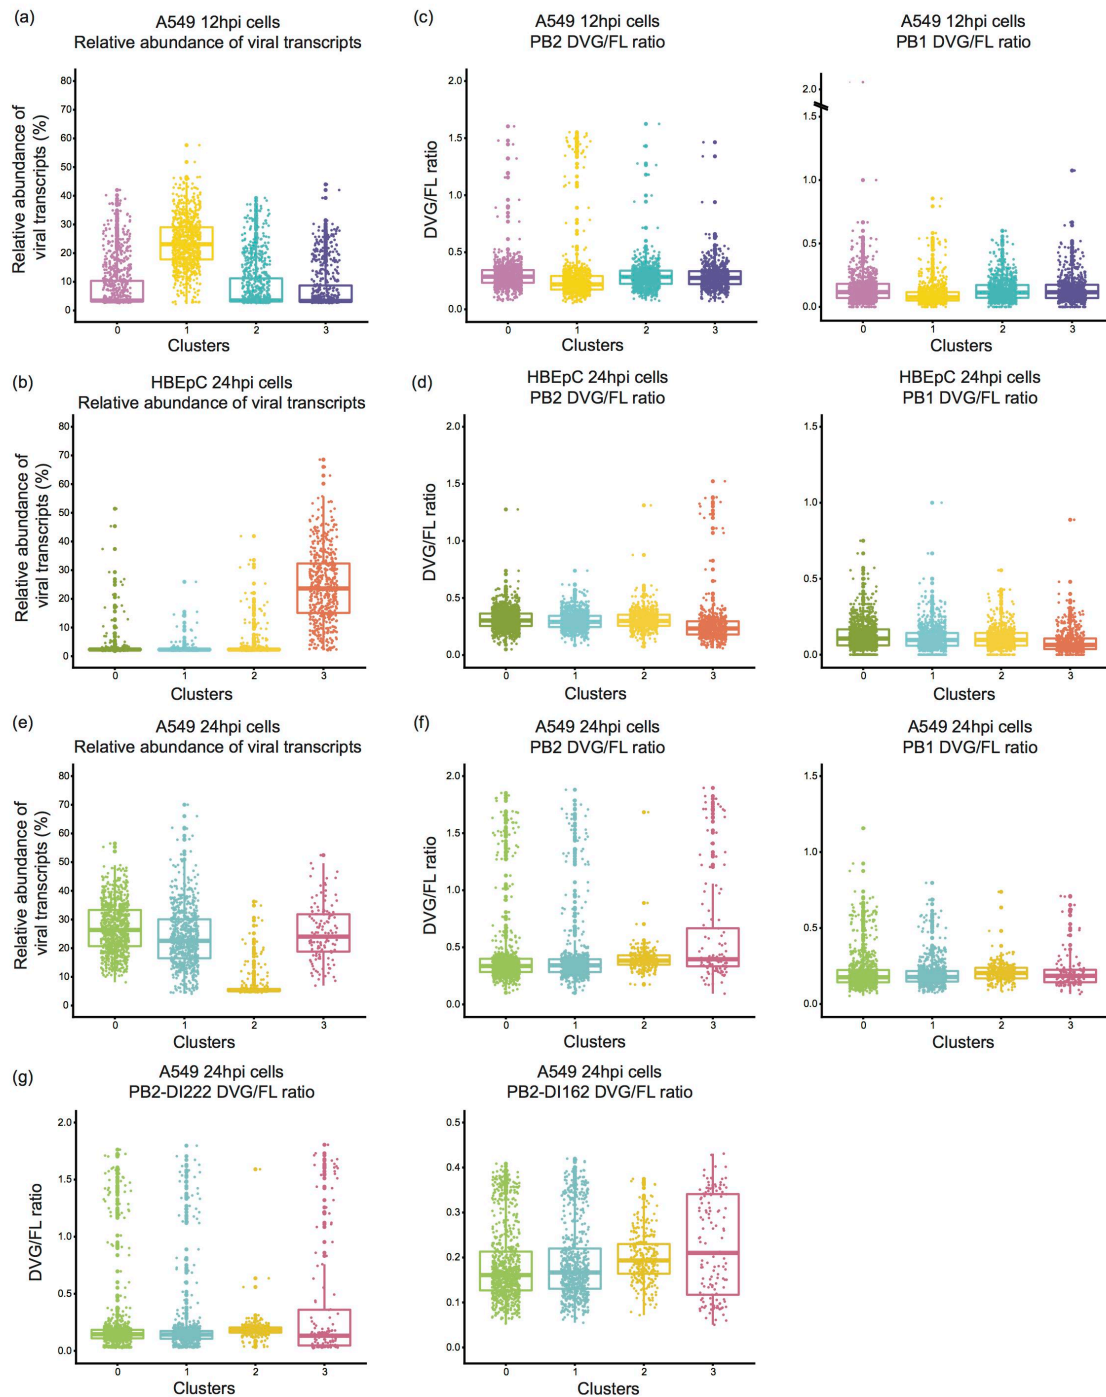

776

777 **Figure 5. Distribution of the relative abundance of viral transcripts and DVG/FL ratio for**

778 **DVG PB2 and PB1 transcripts in each cluster of cells. (a, b, and e) Box-plot of the relative**

779 **abundance of viral transcripts in each cluster of (a) A549 cells at 12hpi, (e) 24hpi, and (b)**

780 **HBEpC cells at 24hpi. (c, d, and f) The DVG/FL ratio for DVG PB2 and PB1 transcripts**

781 calculated as the ratio of gap-spanning reads to non-gap-spanning reads aligned to a 3'  
782 coverage peak region derived from the corresponding viral segments in each cluster. **(g)** The  
783 DVG/FL ratio for DVG PB2 transcripts carrying deletion sites similar to those in PR8-DI222 and  
784 PR8-DI162 viruses in each cluster of A549 cells at 24hpi. All box plots show the first and third  
785 quantiles as the lower and upper hinges, the median in the center, and  $1.5 * \text{inter-quartile range}$   
786 (IQR) from the first and third quantiles as the whiskers.  
787

Fig 6.

(a)

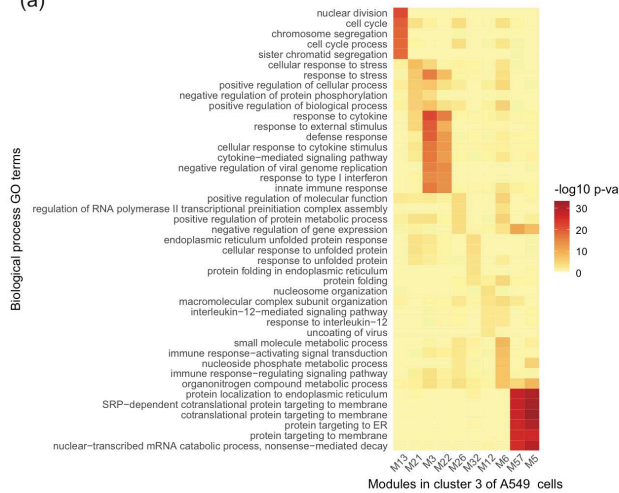

M3

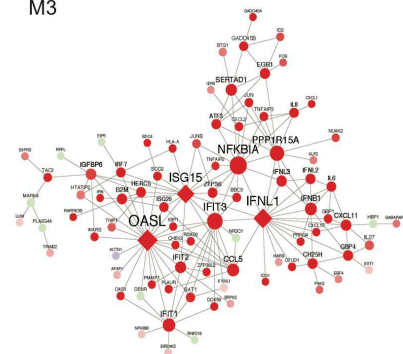

(b)

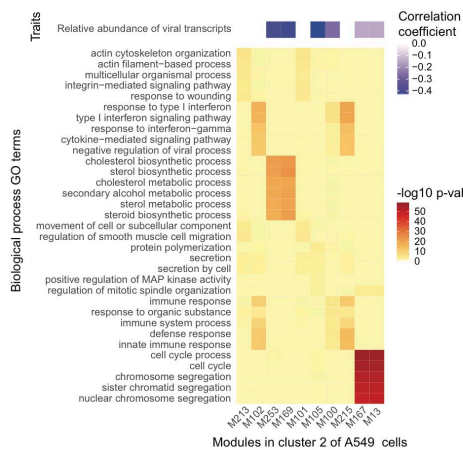

M100

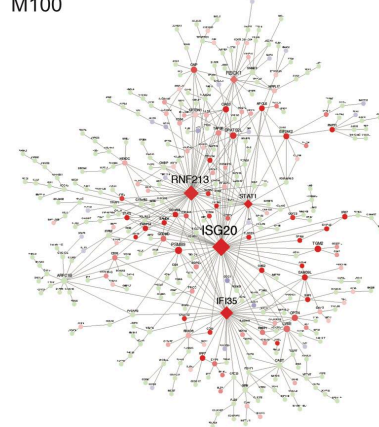

(c)

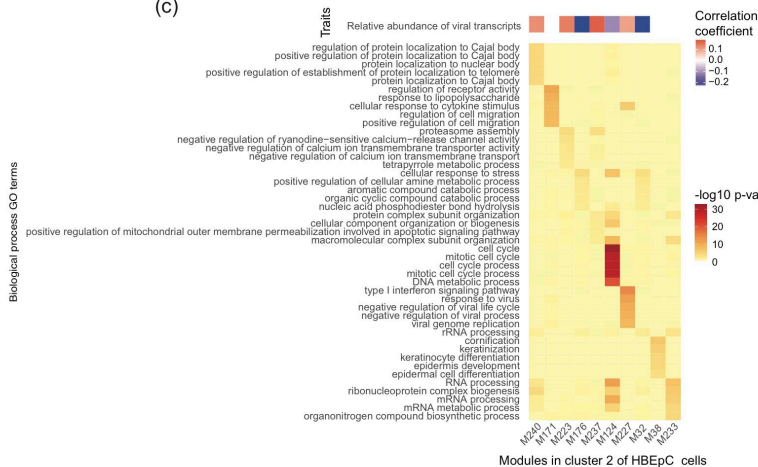

M227

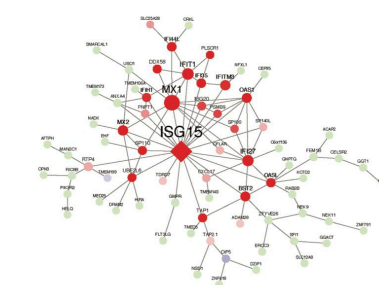

788

789 **Figure 6. Functional MEGENA modules in clusters of A549 and HBEpC cells at 24hpi. Left**

790 panels show heatmaps of enriched biological process GO terms in the top 10 best ranked



791 modules in clusters **(a)** 3 and **(b)** 2 of A549 cells as well as **(c)** cluster 2 of HBEpC cells at 24hpi  
792 and the correlation between modules and the level of viral transcription. Colors in the heatmaps  
793 of GO terms indicate FET p-values after GO enrichment. Red and blue colors in the correlation  
794 heatmaps denote positive or negative correlation with corresponding modules, respectively.  
795 Right panels show the MEGENA network of modules enriched with innate immune response,  
796 including **(a)** module M3 in cluster 3 of A549 cells, **(b)** module M100 in cluster 2 of A549 cells, **(c)**  
797 module M227 in cluster 2 of HBEpC cells. Red and blue nodes represent significantly up- or  
798 down-regulated genes compared to all mock-infected cells, while light-green nodes denote  
799 genes that are not significantly differentially expressed. Diamond nodes indicate key regulators.  
800 The size of the nodes indicates node strength after Multiscale Hub Analysis within the MEGENA  
801 pipeline.  
802

803 **SUPPORTING INFORMATION**

Supplementary Fig 1.

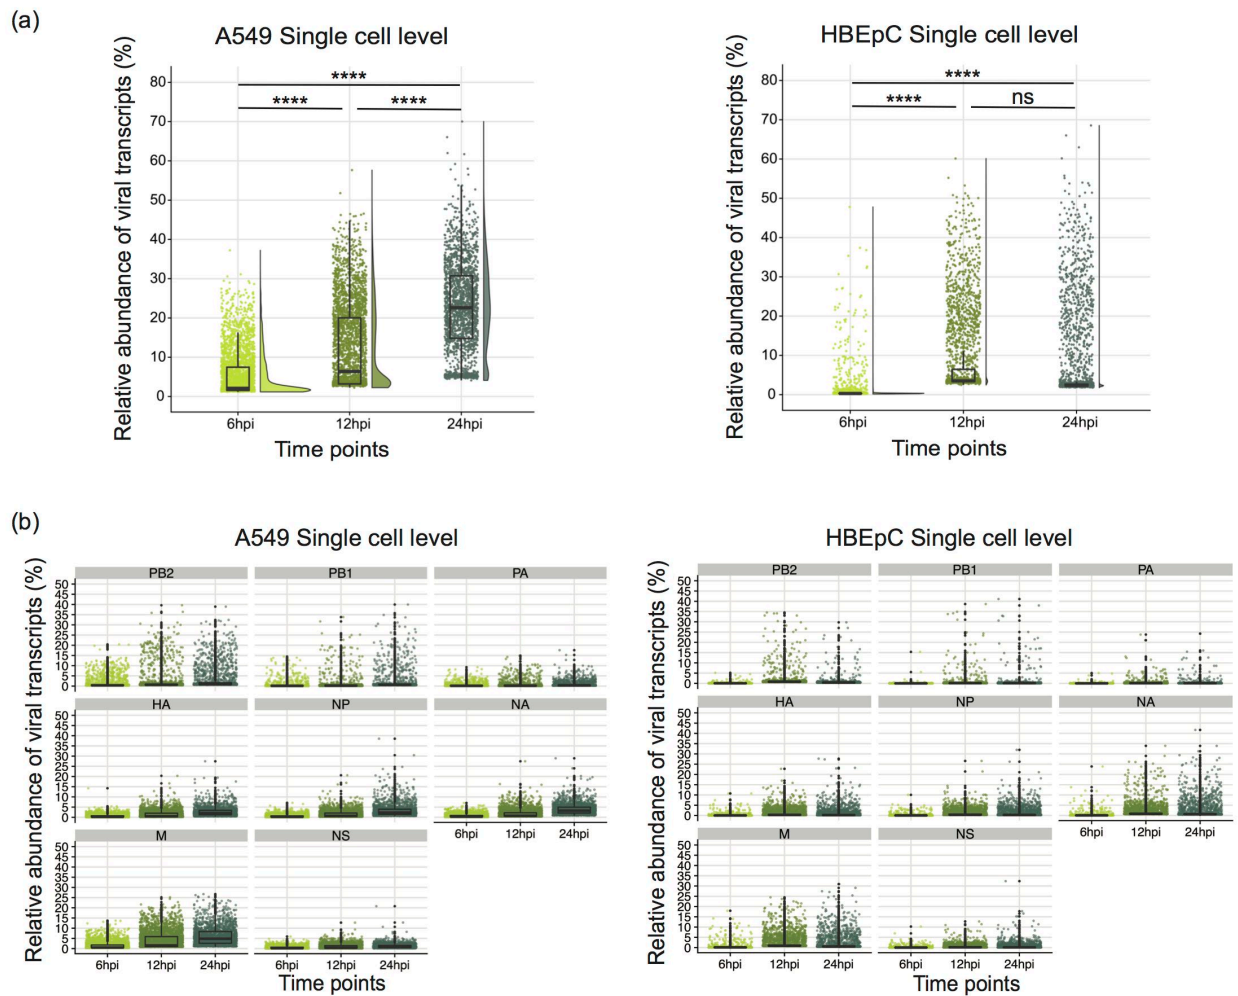

804

805 **Supplementary Figure 1.** Distribution of the relative abundance of viral transcripts within  
806 individual cells over the course of the infection. (a) The overall relative abundance of viral  
807 transcripts was calculated as the percentage of viral reads in the pool of all the reads for each  
808 cell. The dots are colored by the time points. All pairwise comparisons were performed with one-  
809 tailed Wilcoxon rank sum test, for which the null hypothesis was that cells harvested at an  
810 earlier time point have a lower median relative abundance of viral transcripts than those  
811 harvested at a later time point. The significance levels were denoted by the asterisks: \*  $p \leq 0.05$ ,  
812 \*\*  $p \leq 0.01$ , \*\*\*  $p \leq 0.001$ , \*\*\*\*  $p \leq 0.0001$ , and “ns” as not significant. The data for HBEpC cells

813 at 12hpi was collected from a repeated infection assay, due to the initial failure of single-cell  
814 library preparation for the corresponding sample. **(b)** Distribution of the relative abundance of  
815 viral transcripts derived from each segment within individual cells over the course of the  
816 infection. All box plots show the first and third quantiles as the lower and upper hinges, the  
817 median in the center, and  $1.5 \times$  inter-quartile range (IQR) from the first and third quantiles as the  
818 whiskers.

Supplementary Fig 2.

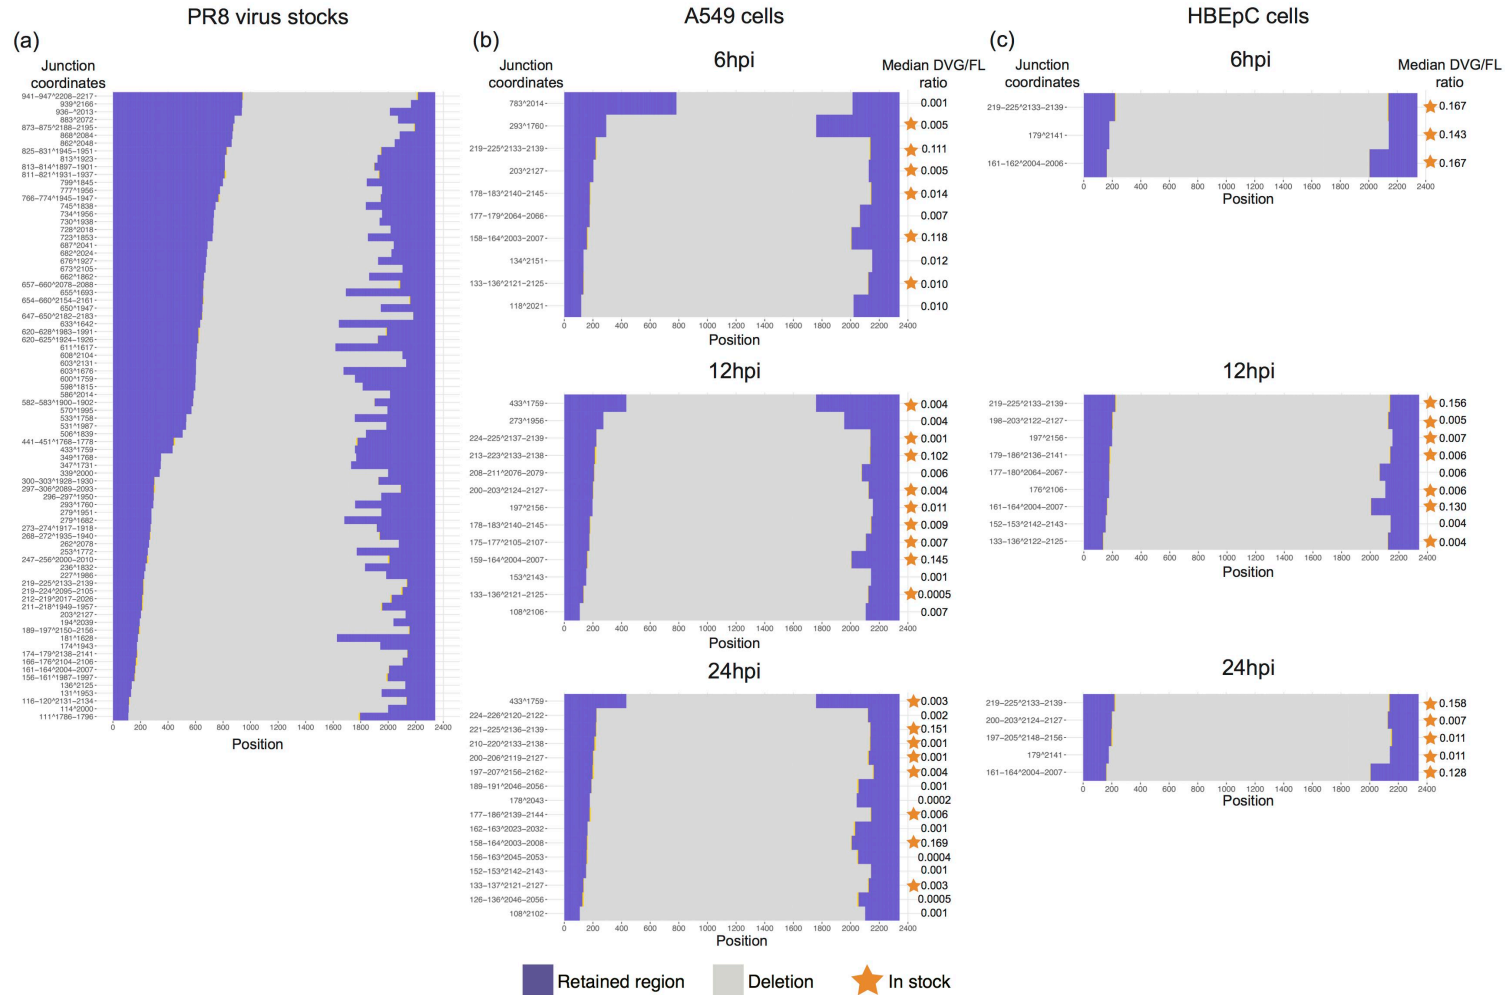

819

820 **Supplementary Figure 2.** Distribution of junction sites in the PB2 segment and the medians of their DVG/FL ratio in cells where a  
 821 given defective viral transcript was detected. **(a)** The defective PB2 segments detected in the PR8 virus stock used for infection. **(b-c)**

822 The DVG PB2 transcripts detected in **(b)** A549 and **(c)** HBEpC cells over the course of the infection. Transcripts carrying the same  
823 junction sites as seen in the virus stock were denoted by asterisks.

824

Supplementary Fig 3.

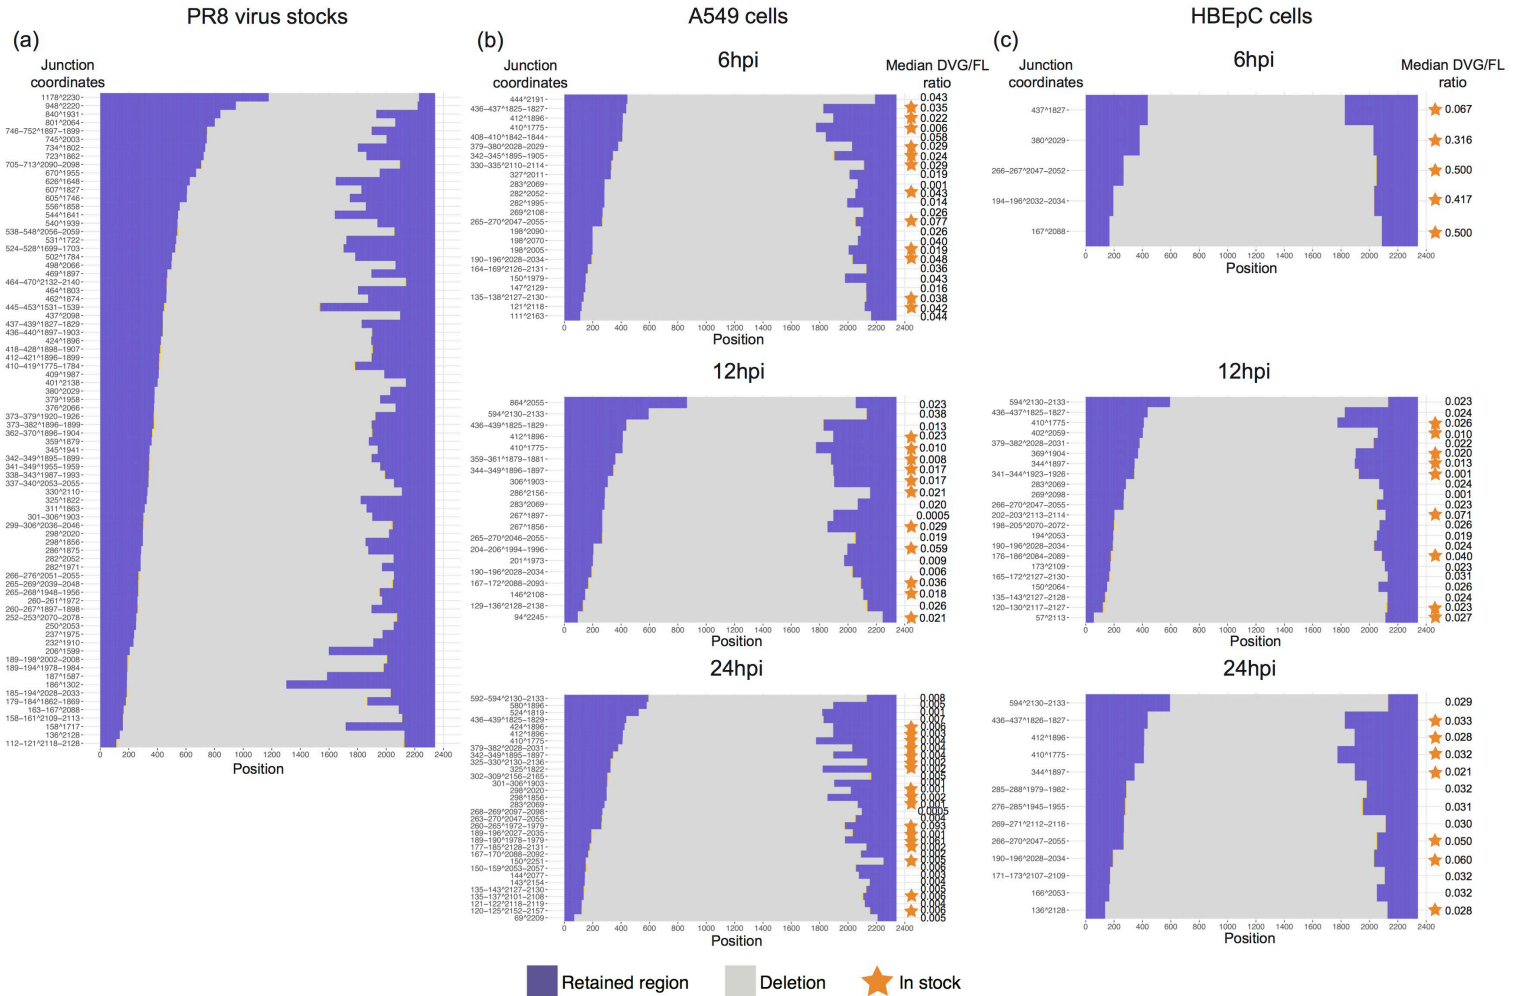

825

826 **Supplementary Figure 3.** Distribution of junction sites in the PB1 segment and the medians of their DVG/FL ratio in cells where a  
 827 given defective viral transcript was detected.

Supplementary Fig 4.

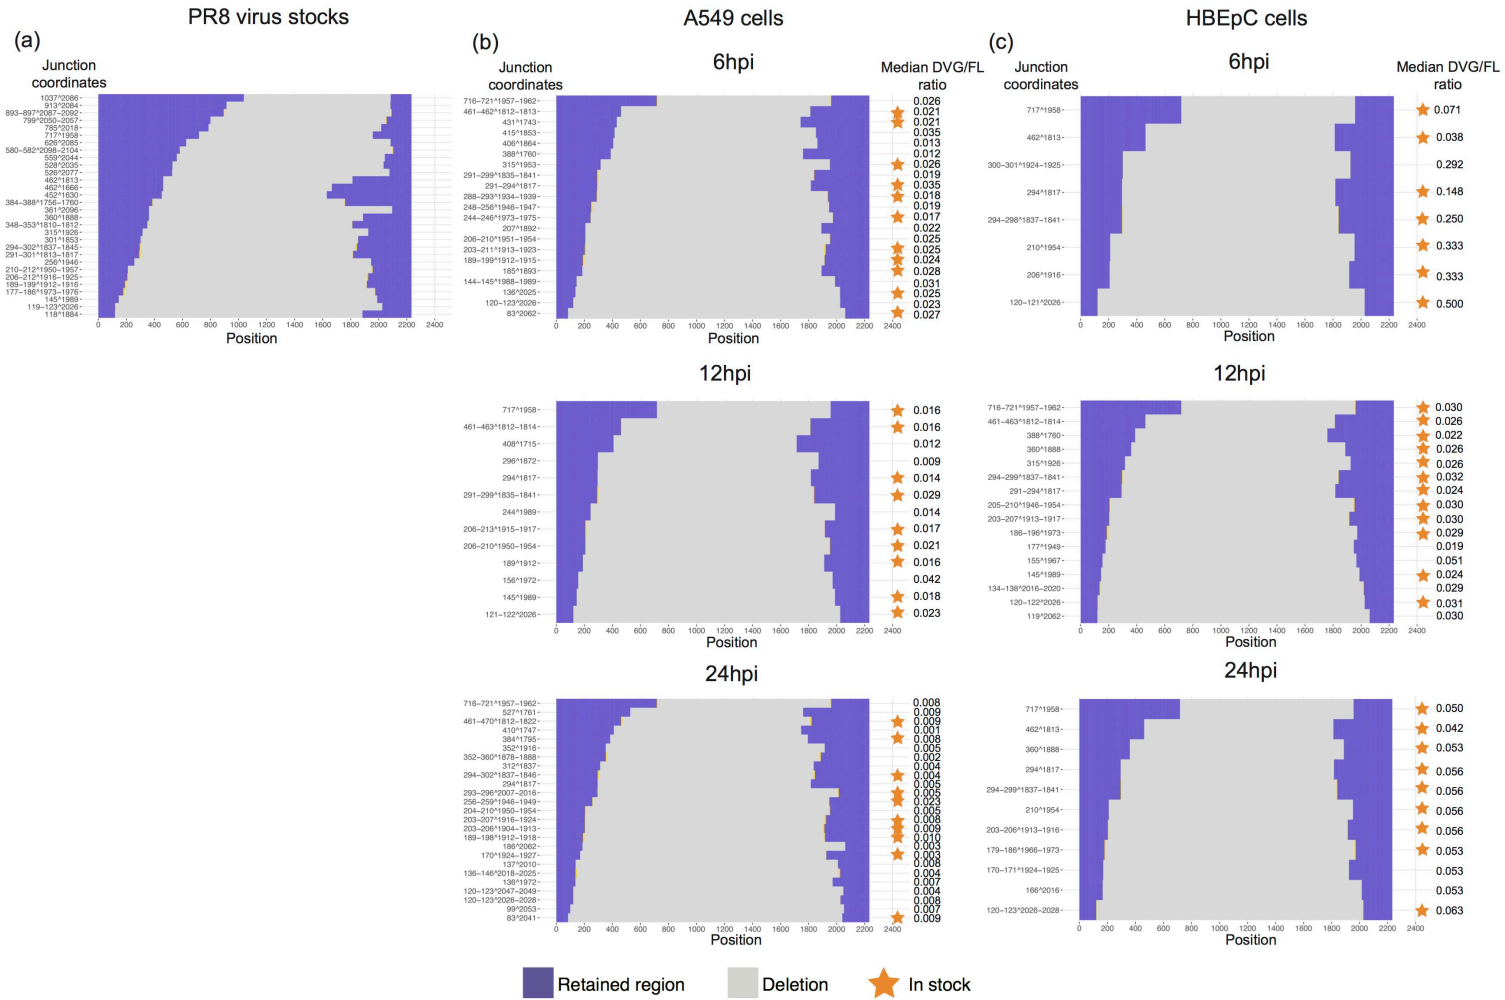

828

829 **Supplementary Figure 4.** Distribution of junction sites in the PA segment and the medians of their DVG/FL ratio in cells where a  
 830 given defective viral transcript was detected.

## Supplementary Fig 5.

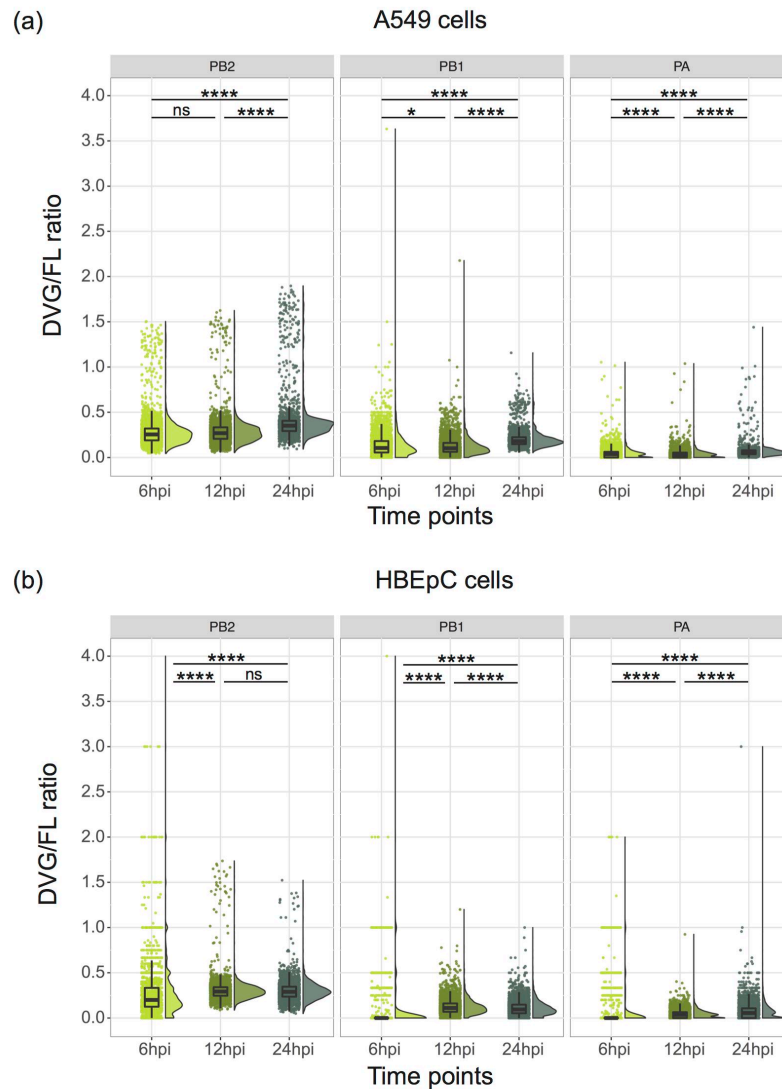

831

832 **Supplementary Figure 5.** Distribution of the DVG/FL ratio in A549 and HBEPC cells over the  
833 course of the infection. All pairwise comparisons were performed with two-tailed Wilcoxon rank  
834 sum test, for which the null hypothesis was that cells harvested at two different time points have  
835 different median relative abundance of viral transcripts. The significance levels were denoted by  
836 the asterisks: \*  $p \leq 0.05$ , \*\*  $p \leq 0.01$ , \*\*\*  $p \leq 0.001$ , \*\*\*\*  $p \leq 0.0001$ , and “ns” as not significant.  
837 All box plots show the first and third quantiles as the lower and upper hinges, the median in the  
838 center, and 1.5 \* inter-quartile range (IQR) from the first and third quantiles as the whiskers.



Supplementary Fig 6.

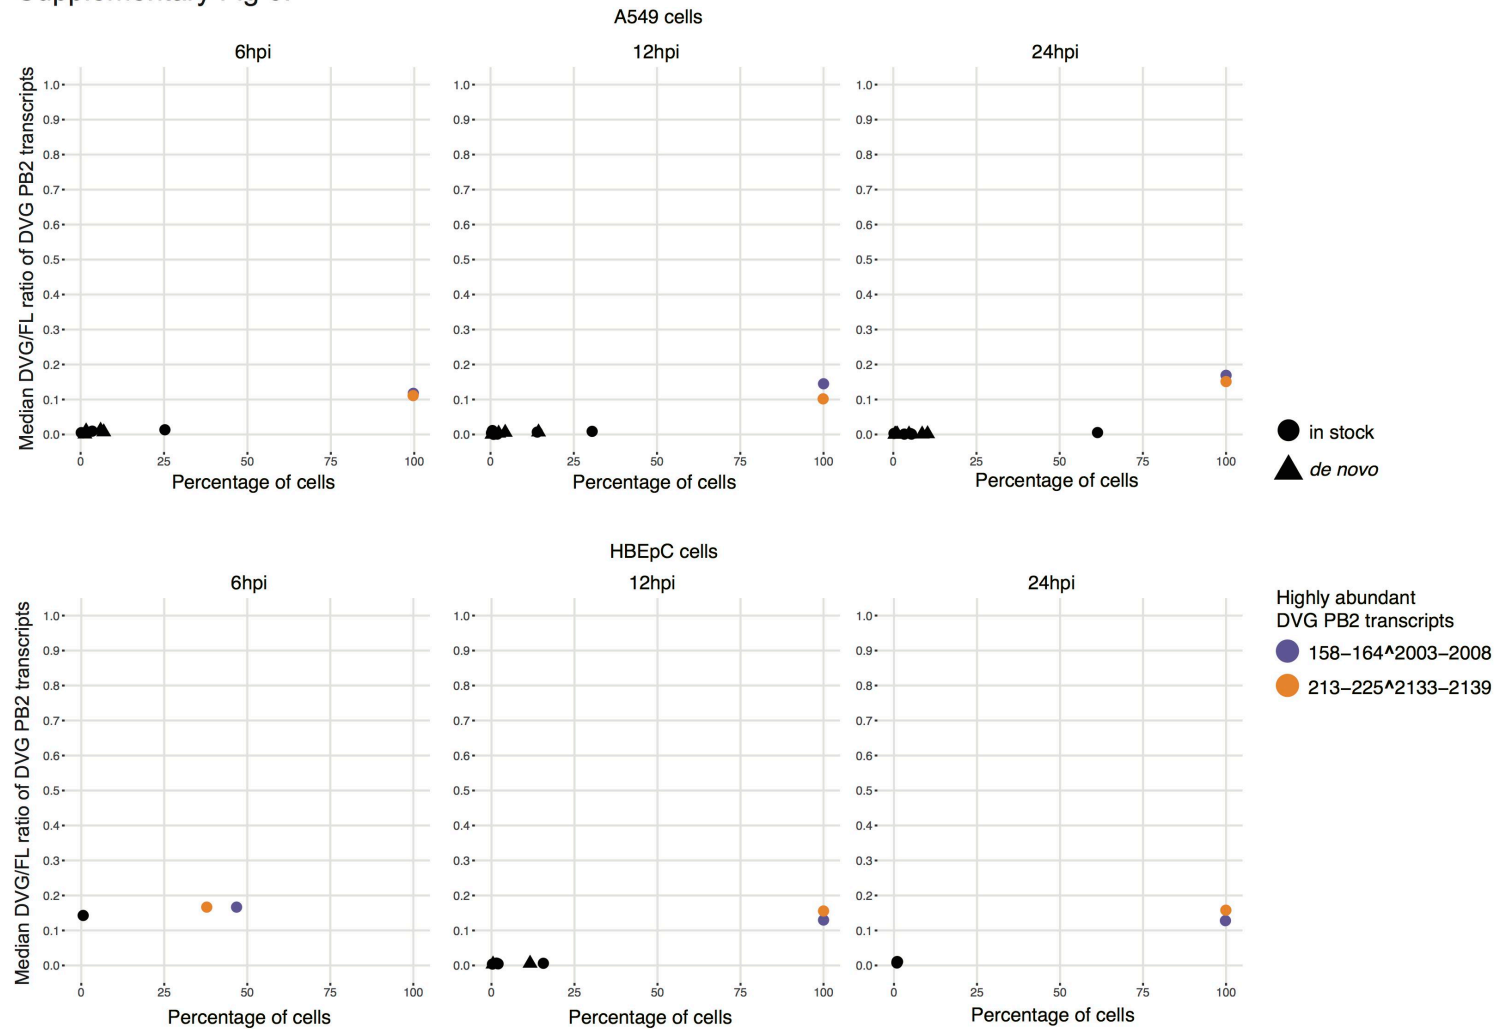

839

840 **Supplementary Figure 6.** Percentage of A549 and HBEpC cells in which a given DVG PB2 transcript was detected versus the  
841 median of the DVG/FL ratio for that transcript in those cells over the course of the infection. Each type of DVG PB2 transcript was

842 represented by a dot or triangle. A dot denoted the DVG transcripts also seen in the virus stock and a filled triangle denoted the *de*  
843 *novo* generated transcripts. Two dominant DVG PB2 species were highlighted in slate blue and orange.

844

Supplementary Fig 7.

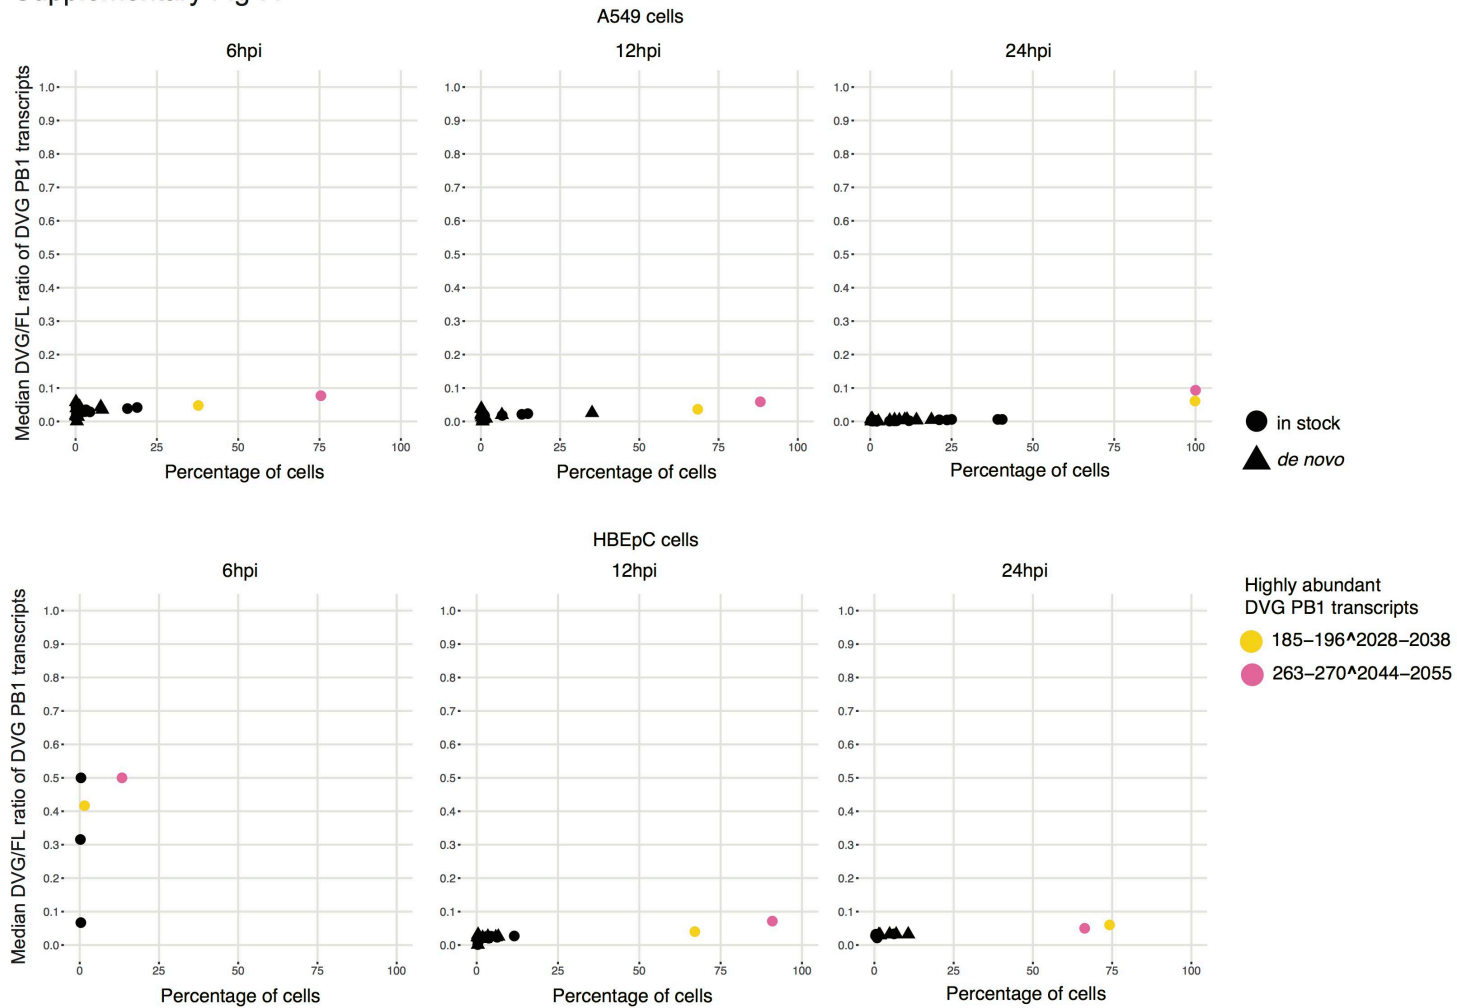

845

846 **Supplementary Figure 7.** Percentage of A549 and HBEpC cells in which a given DVG PB1 transcript was detected versus the  
847 median of the DVG/FL ratio for that transcript in those cells over the course of the infection. Two dominant DVG PB1 species were  
848 highlighted in yellow and pink.

Supplementary Fig 8.

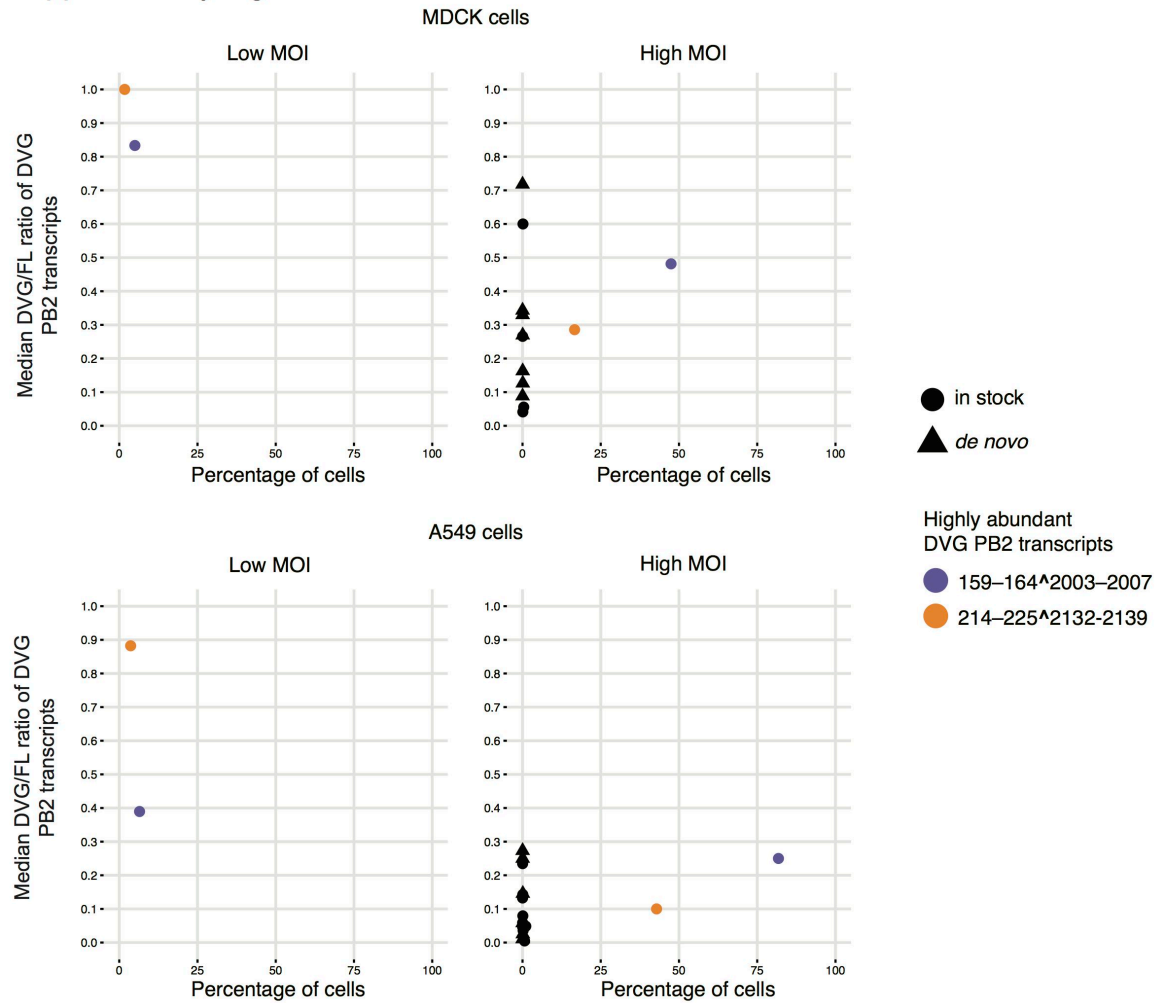

849

850 **Supplementary Figure 8.** Percentage of MDCK and A549 cells in which a given DVG PB2 transcript was detected versus the  
 851 median of the DVG/FL ratio for that transcript in those cells. MDCK and A549 cells were infected with the same PR8 virus stock at

852 high (5) or low (0.2) MOI and harvested at 6hpi followed by 10X Genomics 3' single-cell library preparation and sequencing. Two

853 dominant DVG PB2 species were highlighted in slate blue and orange.

854

Supplementary Fig 9.

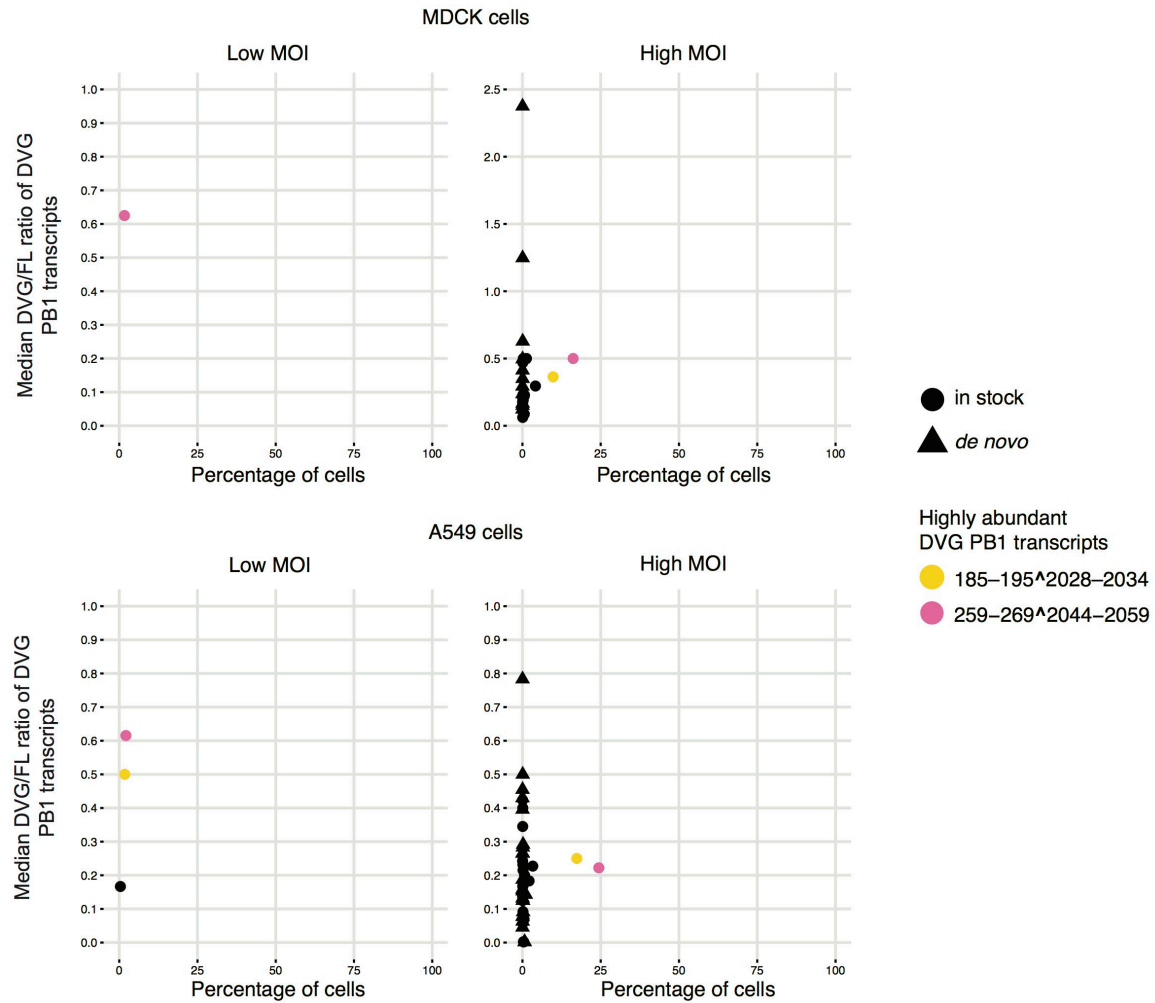

855

856 **Supplementary Figure 9.** Percentage of MDCK and A549 cells in which a given DVG PB1 transcript was detected versus the  
857 median of the DVG/FL ratio for that transcript in those cells. MDCK and A549 cells were infected with the same PR8 virus stock at

858 high (5) or low (0.2) MOI and harvested at 6hpi followed by 10X Genomics 3' single-cell library preparation and sequencing. Two

859 dominant DVG PB1 species were highlighted in yellow and pink.

860

Supplementary Fig 10.

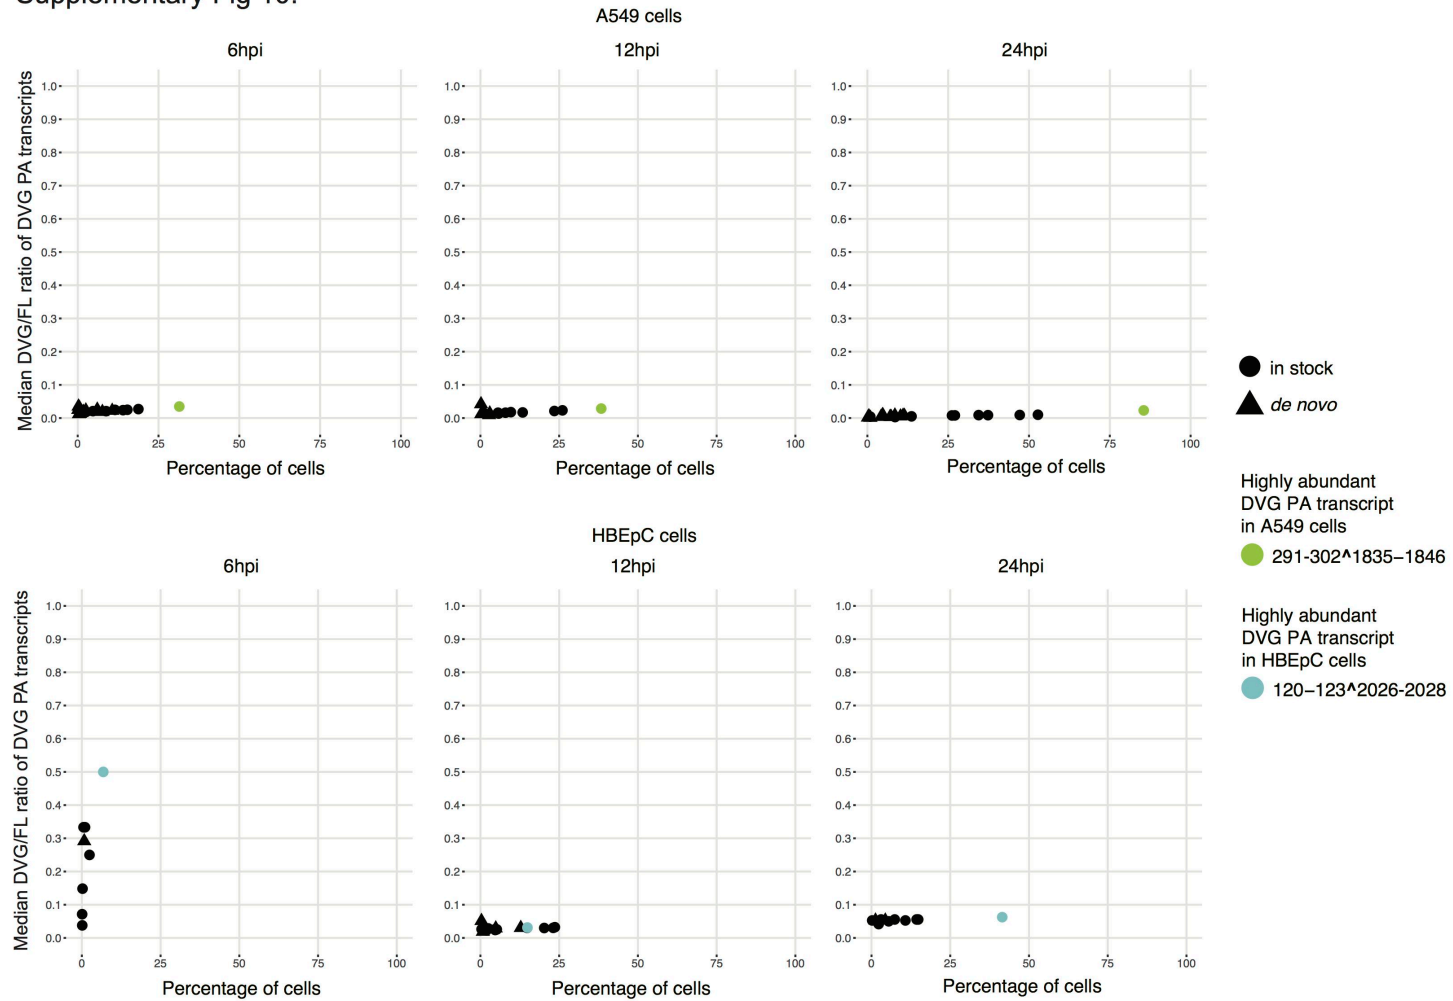

861

862 **Supplementary Figure 10.** Percentage of A549 and HBEpC cells in which a given DVG PA transcript was detected versus the  
 863 median of the DVG/FL ratio for that transcript in those cells over the course of the infection. The dominant DVG PA species in each  
 864 cell type were highlighted.



Supplementary Fig 11.

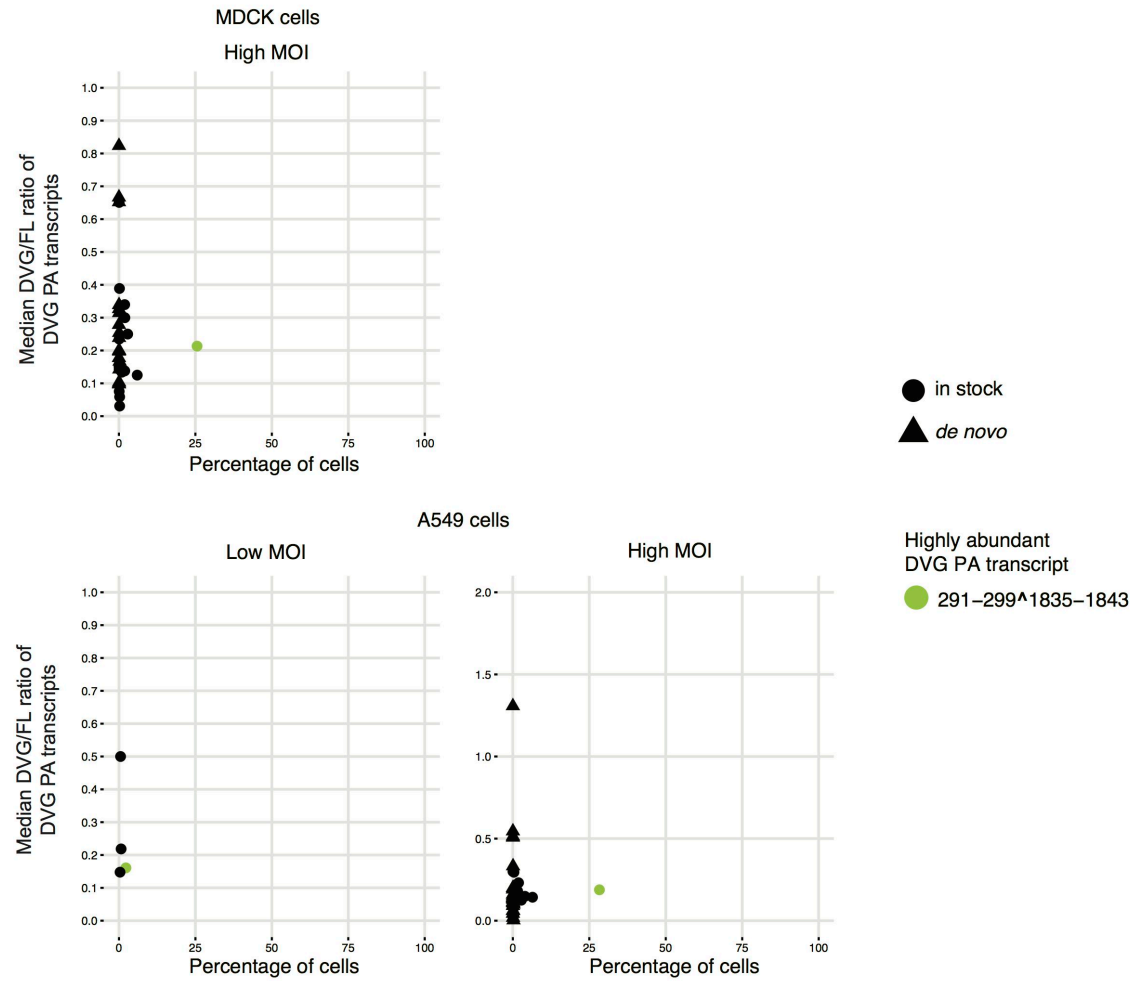

865

866 **Supplementary Figure 11.** Percentage of MDCK and A549 cells in which a given DVG PA transcript was detected versus the  
867 median of the DVG/FL ratio for that transcript in those cells. MDCK and A549 cells were infected with the same PR8 virus stock at  
868 high (5) or low (0.2) MOI and harvested at 6hpi followed by 10X Genomics 3' single-cell library preparation and sequencing. The

869 DVG PA transcripts were not detected in MDCK cells infected at low MOI. The dominant DVG PA species was highlighted in  
870 chartreuse.

## Supplementary Fig 12.

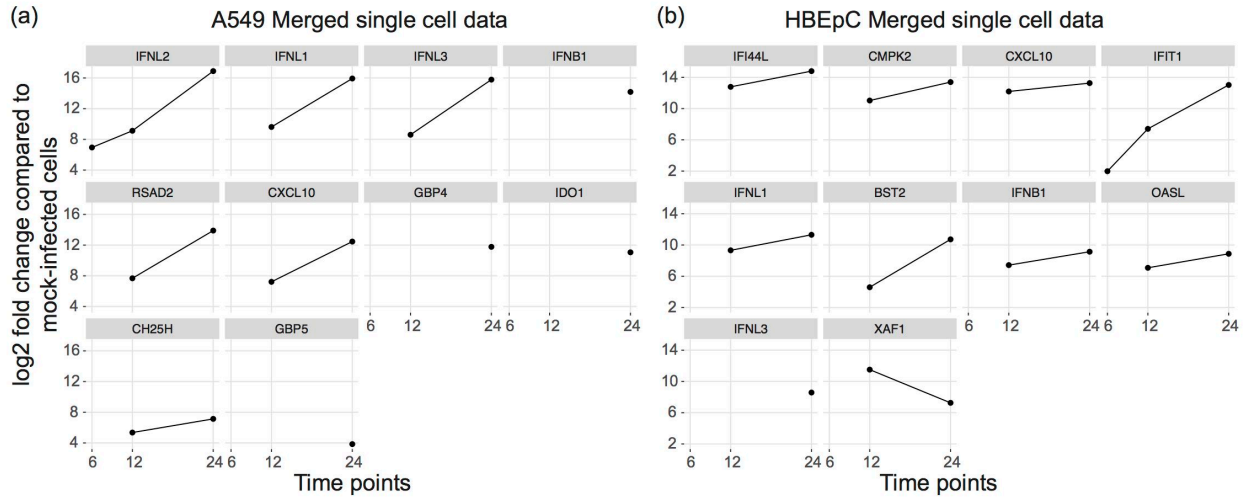

871

872 **Supplementary Figure 12.** The log<sub>2</sub> fold change of the top 10 differentially expressed genes

873 identified at the bulk level in merged single-cell data that mimics the bulk level measurements.

874 The results from edgeR are shown.

875

### Supplementary Fig 13.

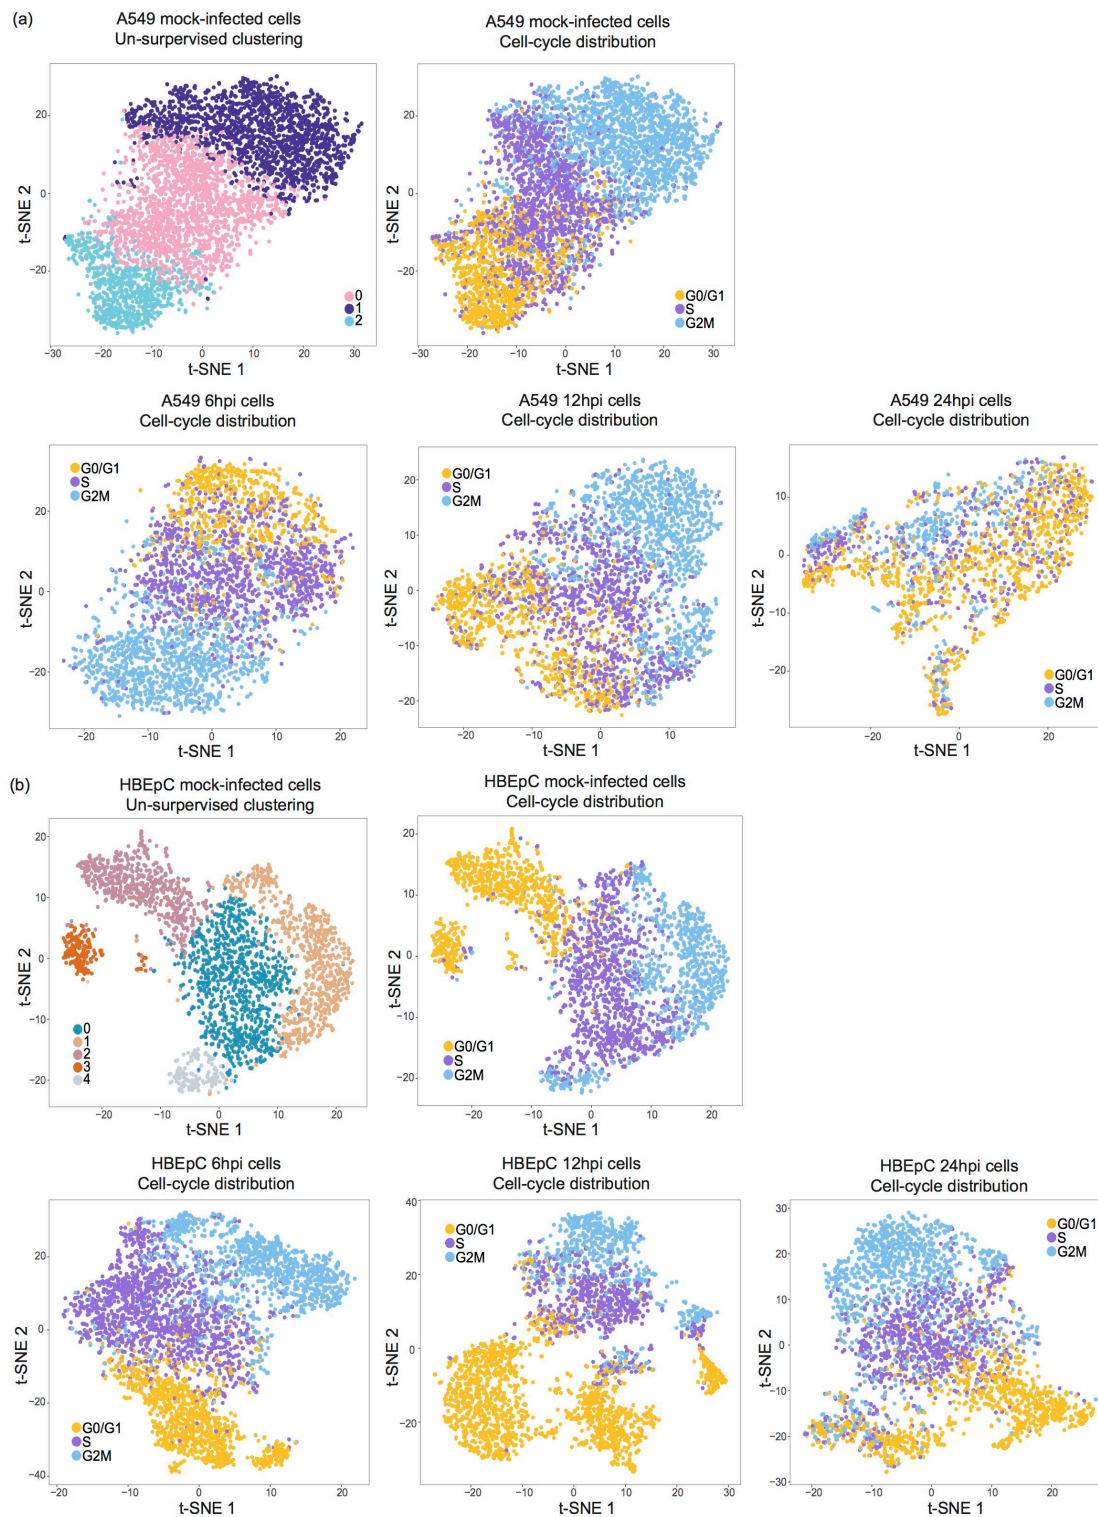

876

877 **Supplementary Figure 13.** Visualization of un-supervised cell clustering on a t-SNE plot for

878 mock-infected **(a)** A549 and **(b)** HBEpC cells and the distribution of cell-cycle within the

879 population at each time point in two cell types. Each dot represents a cell on the t-SNE plot.  
880 Dots were colored by either the cluster identities for the mock-infected cells, or the cell-cycle  
881 stages for mock- and PR8-infected cells. The cell-cycle stage was assigned to each cell based  
882 on the expression level of a list of cell-cycle markers.  
883

### Supplementary Fig 14.

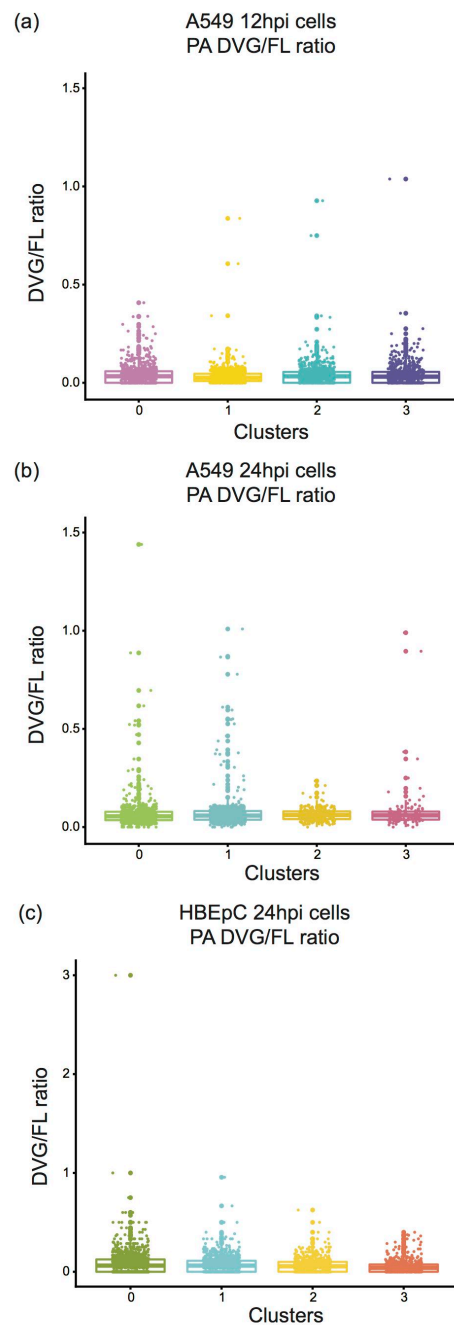

884

885 **Supplementary Figure 14.** Distribution of the DVG/FL ratio for the DVG PA transcripts in each  
886 cluster of A549 cells at 12hpi and 24hpi and HBEpC cells at 24hpi. All box plots show the first  
887 and third quartiles as the lower and upper hinges, the median in the center, and  $1.5 \times$  inter-  
888 quartile range (IQR) from the first and third quartiles as the whiskers.

## Supplementary Fig 15.

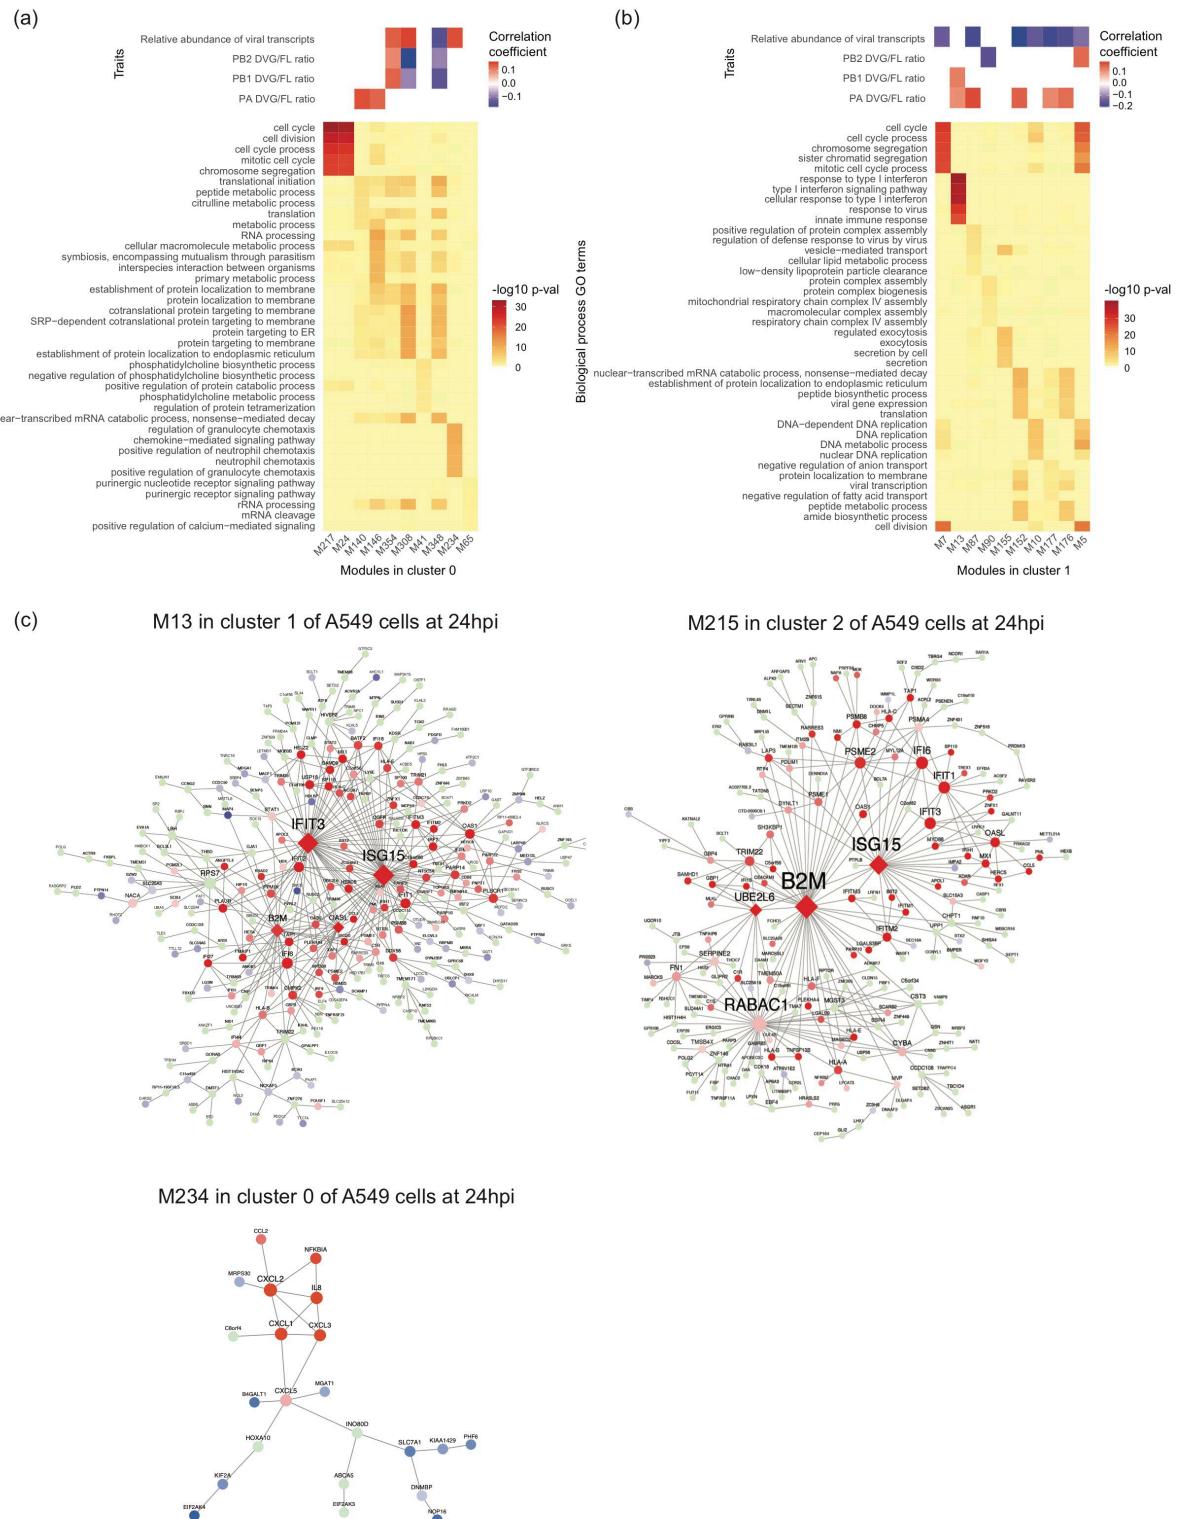

889

890 **Supplementary Figure 15.** Functional MEGENA modules in clusters 0 and 1 of A549 at 24hpi

891 and networks revealing key regulators in modules enriched with innate immune response terms.

892 **(a-b)** Heatmaps of enriched biological process GO terms in the top 10 best ranked modules in  
893 clusters **(a)** 0 and **(b)** 1 of A549 cells and the correlation between modules and the level of viral  
894 transcription and DVG accumulation. Colors in the heatmaps of GO terms indicate FET p-values  
895 after GO enrichment. Red and blue colors in the correlation heatmaps denote positive or  
896 negative correlation with corresponding modules, respectively. **(c)** MEGENA network of  
897 modules that are enriched for the innate immune response, including module M13 in cluster 1,  
898 module M215 in cluster 2, and module M234 in cluster 0 of A549 cells. Red and blue nodes  
899 represent significantly up- or down-regulated genes compared to all mock-infected cells, while  
900 light-green nodes denote genes that are not significantly differentially expressed. Diamond  
901 nodes indicate key regulators. The size of nodes indicates node strength after Multiscale Hub  
902 Analysis within the MEGENA pipeline.  
903



## Supplementary Fig 16.

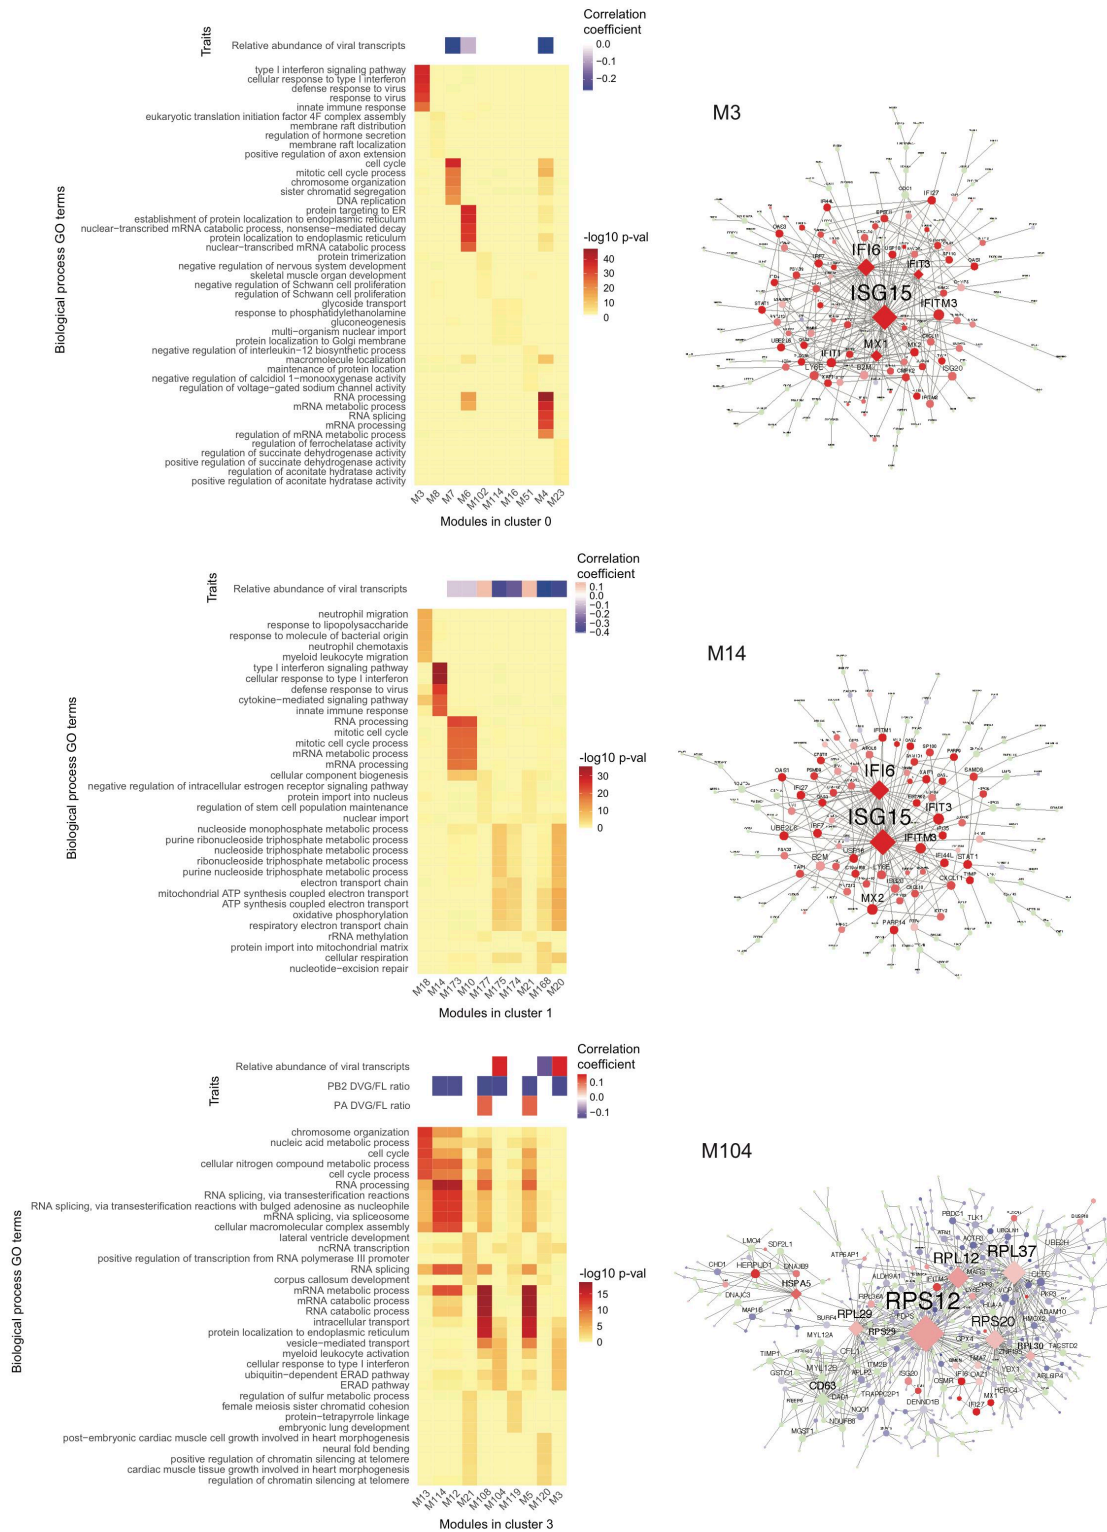

904

905 **Supplementary Figure 16.** Functional MEGENA modules in clusters 0, 1, and 3 of HBEpC at

906 24hpi and co-expression networks revealing modules enriched for type I IFN response. The left

907 panel shows the heatmaps of enriched biological process GO terms in the top 10 best ranked  
908 modules and the correlation between modules and the level of viral transcription and DVG  
909 accumulation. Colors in the heatmaps of GO terms indicate FET p-values after GO enrichment.  
910 Red and blue colors in the correlation heatmaps denote positive or negative correlation with  
911 corresponding modules, respectively. The right panel shows modules, including module M3 in  
912 cluster 0, module M14 in cluster 1, and module M104 in cluster 3, enriched for type I IFN  
913 response.  
914

Supplementary Fig 17.

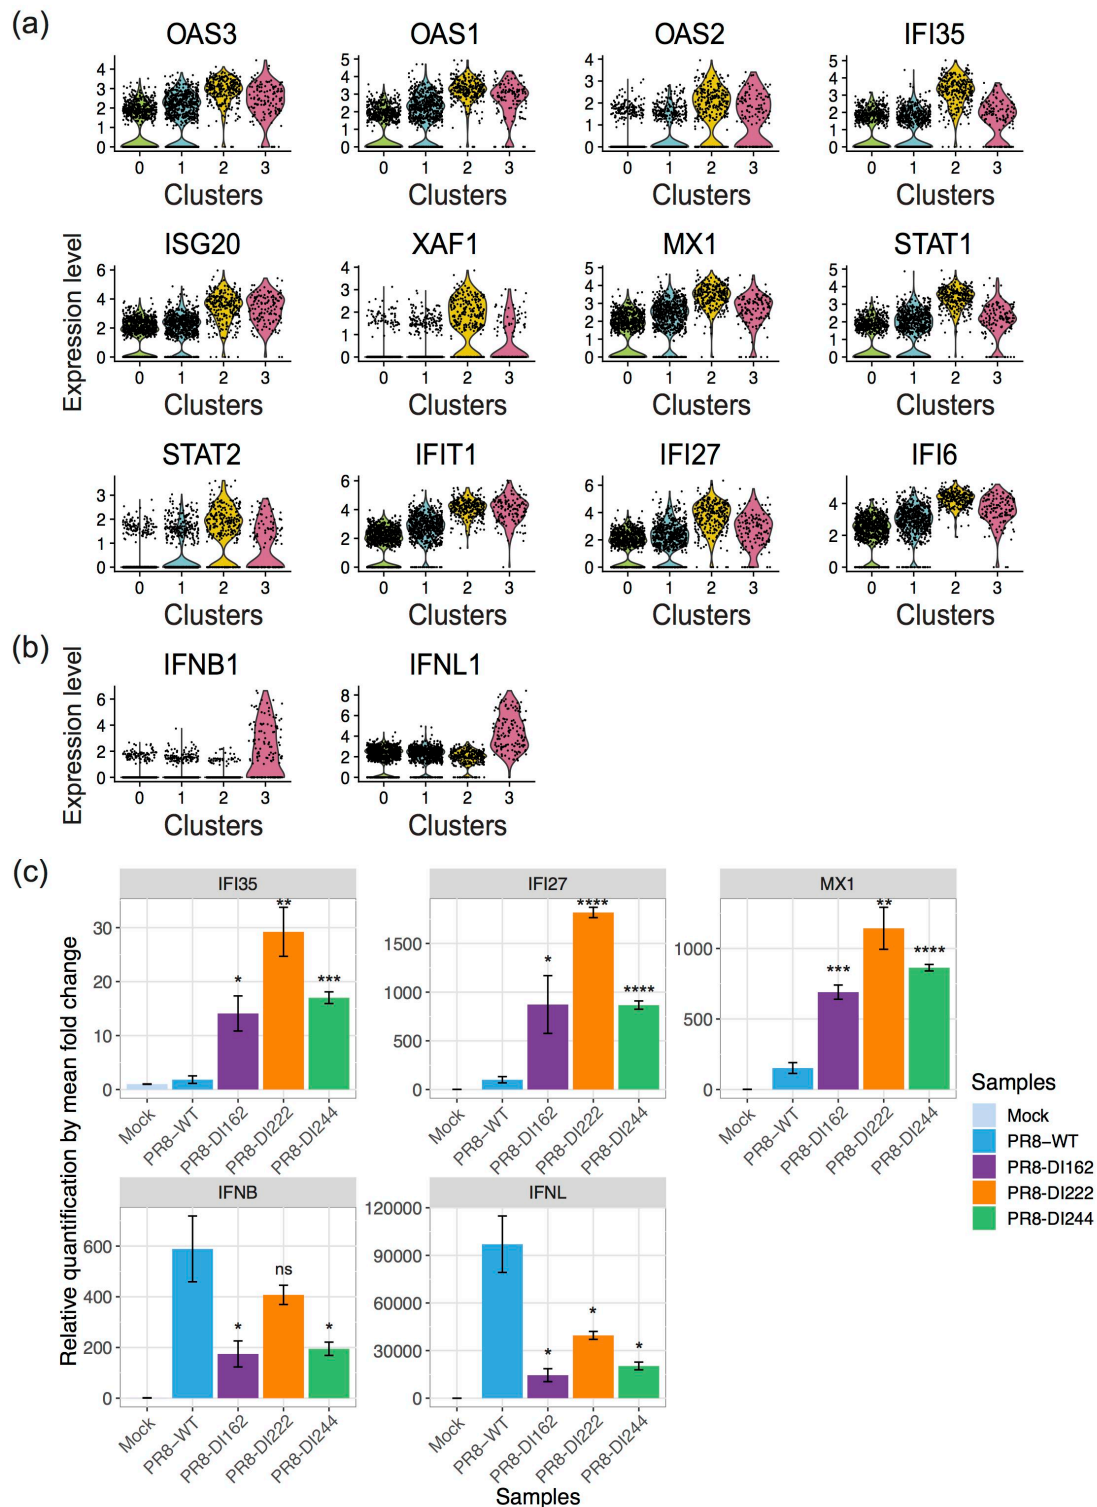

915

916 **Supplementary Figure 17.** Expression of ISGs and IFNs in DI-enriched A549 cells at 24hpi. (a-

917 b) The expression level of (a) significantly over-expressed genes in cluster 2, which are

918 associated with GO terms related to the type I IFN signaling pathway and have the fold change  
919 on the log-scale  $\geq 1$ , and **(b)** type I and III IFNs, in each cluster of A549 cells at 24hpi. The dot  
920 represents the normalized expression level of a gene in each cell. The violin shade is colored by  
921 the cluster identity. **(c)** Validation of over-expression of selected ISGs and IFNs by qPCR.  
922 Subconfluent A549 cells were either mock-infected or infected with one type of PR8-DI virus  
923 (PR8-DI162, -DI222, or -DI244) or PR8-WT virus at a MOI of 10. Total RNA was extracted from  
924 cells collected at 24hpi. The levels of ISGs and IFNs mRNA were determined by qPCR and  
925 normalized to the level of  $\beta$ -actin (ACTB). The error bar representing the standard deviation of  
926 the mean was obtained from three biological replicates. Statistical tests were done using two-  
927 tailed Student's *t*-test in R to compare the differences in fold change between PR8-WT and  
928 PR8-DI infection. The significance levels were denoted by the asterisks: \*  $p \leq 0.05$ , \*\*  $p \leq 0.01$ ,  
929 \*\*\*  $p \leq 0.001$ , \*\*\*\*  $p \leq 0.0001$ , and "ns" as not significant.
